# Supplementary material for: A theoretical study on application of BN/CC isosterism to modify topology of coronene aromaticity and HOMO–LUMO energy gaps
Source: Royal Society of Chemistry journal article supplement (doi:10.1039/d4nj01526f), 2024-01-01
Supplement: d4nj01526f1.pdf [file d4nj01526f1.pdf]

# A theoretical study on application of BN/CC isosterism to modify topology of coronene aromaticity and HOMO-LUMO energy gaps

Marija Baranac-Stojanović,<sup>1\*</sup> Milovan Stojanović<sup>2</sup> and Jovana Aleksić<sup>2</sup>

<sup>1</sup> University of Belgrade - Faculty of Chemistry, Studentski trg 12-16, P.O.Box 158, 11000 Belgrade, Serbia

<sup>2</sup> University of Belgrade - Institute of Chemistry, Technology and Metallurgy - Center for Chemistry, Njegoševa 12, P.O.Box 473, 11000 Belgrade, Serbia

## Supplementary Information

### Table of Contents

|                                                                                                                                                                   |     |
|-------------------------------------------------------------------------------------------------------------------------------------------------------------------|-----|
| <b>Section S1.</b> Comparison of the performance of different density functionals.....                                                                            | S2  |
| <b>Section S2.</b> Comparison of the performance of different aromaticity indices.....                                                                            | S9  |
| <b>Table S8.</b> HOMA, FLU, PDI and EDDB <sub>p</sub> values for isolated reference carbocyclic compounds at the $\omega$ B97XD/6-311+G(d,p) level of theory..... | S12 |
| <b>Table S9.</b> Energies of HOMO and LUMO orbitals and their difference (HOMO-LUMO energy gap) calculated with different functionals.....                        | S13 |
| <b>Figure S4.</b> Correlations between HOMO-LUMO gaps calculated with different functionals.....                                                                  | S13 |
| <b>References</b> .....                                                                                                                                           | S14 |
| Absolute energies and x, y, z coordinates of structures optimized at the $\omega$ B97XD/6-311+G(d,p) level of theory.....                                         | S15 |
| Absolute energies and x, y, z coordinates of structures optimized at the B3LYP-D3(BJ)/6-311+G(d,p) level of theory.....                                           | S24 |
| Absolute energies and x, y, z coordinates of structures optimized at the M06-2X/6-311+G(d,p) level of theory.....                                                 | S32 |

## S1. Comparison of the performance of different density functionals

A comparison of calculated and experimental<sup>1</sup> bond lengths of **Cor** is given in Table S1. It can be seen that all three functionals yielded structures in close agreement with the experimental one. Since the latter was obtained by the X-ray analysis, some deviations between the calculated (isolated molecule in gas phase) and experimental data are expected. The largest deviation, 0.013 Å, was found for the rim double bond calculated with the B3LYP-D3(BJ).

The calculated HOMA, FLU, PDI and EDDB<sub>p</sub> using all three functionals are collected in Tables S2-S5 and correlation diagrams are presented in Figure S1. It can be seen that for all aromaticity indices the best correlations were obtained between ωB97XD and M06-2X: HOMA,  $R^2 = 0.9994$ ,  $y = 0.9857x + 0.0203$ ; FLU,  $R^2 = 0.9996$ ,  $y = 0.9956x - 0.0000$ ; PDI,  $R^2 = 0.9997$ ,  $y = 1.0181x - 0.0006$  and EDDB<sub>p</sub>,  $R^2 = 0.9998$ ,  $y = 0.9945x - 0.0050$ . Only slightly worse were the correlations with the B3LYP functional:  $R^2$  varied from 0.9818 to 0.9987, the slope of the regression line from 0.9638 to 1.1390 and the intercept from 0.0008 to 0.0797. The FLU and PDI showed the least variation when calculated with different functionals and HOMA the largest, although all variations were very small, as shown by the line equation and correlation coefficients.

NICS<sub>πzz</sub>-xy scans obtained with all three functionals are shown in Figure S2. They are also very similar and the main difference is the total shielding of the central ring in the studied systems. B3LYP indicates the largest difference between shielding of this ring in **Cor** and **Cor-9BN**, where it is more shielded in the former compound, although the difference is small  $\approx 2$  ppm. This difference disappears when calculated with the M06-2X and reverses with ωB97XD when the central ring of **Cor-9BN** is more shielded by only 0.7 ppm.

Based on the above discussion, we conclude that all three functionals correctly describe the studied systems and can be considered reliable.

**Table S1.** Calculated and experimental (X-ray)<sup>1</sup> bond lengths (Å) of coronene, averaged to  $D_{6h}$  symmetry.

| Bond type       | B3LYP-D3(BJ) | M06-2X | ωB97XD | exp.  |
|-----------------|--------------|--------|--------|-------|
| Inner benzene   | 1.425        | 1.425  | 1.424  | 1.423 |
| Spoke bond      | 1.418        | 1.410  | 1.408  | 1.416 |
| Rim single bond | 1.422        | 1.423  | 1.422  | 1.421 |
| Rim double bond | 1.370        | 1.365  | 1.363  | 1.357 |

**Table S2.** Calculated HOMA values for individual rings **A-G**, molecular primer (**peri**) and perimeter of carbocyclic subunits (**carbo-peri**) of coronene and its BN analogues using different functionals and 6-311+G(d,p) basis set.

|                                    | A     | B     | C     | D     | E     | F     | G     | peri  | carbo-peri |
|------------------------------------|-------|-------|-------|-------|-------|-------|-------|-------|------------|
|                                    |       |       |       |       |       |       |       |       |            |
| <b>Cor</b>                         |       |       |       |       |       |       |       |       |            |
| B3LYP-D3(BJ) $D_{6h}$              | 0.649 | 0.750 | 0.750 | 0.750 | 0.750 | 0.750 | 0.750 | 0.774 | /          |
| M06-2X $D_{6h}$                    | 0.651 | 0.774 | 0.774 | 0.774 | 0.774 | 0.774 | 0.774 | 0.747 | /          |
| $\omega$ B97XD $C_{2h}$            | 0.657 | 0.782 | 0.782 | 0.782 | 0.782 | 0.782 | 0.782 | 0.746 | /          |
| <b>Cor <math>C_3</math></b>        |       |       |       |       |       |       |       |       |            |
| B3LYP                              | 0.651 | 0.750 | 0.750 | 0.750 | 0.750 | 0.750 | 0.750 | 0.774 | /          |
| M06-2X                             | 0.648 | 0.772 | 0.772 | 0.772 | 0.772 | 0.772 | 0.772 | 0.743 | /          |
| $\omega$ B97XD                     | 0.657 | 0.782 | 0.781 | 0.782 | 0.781 | 0.782 | 0.781 | 0.745 | /          |
| <b>Cor-3BN <math>C_{3h}</math></b> |       |       |       |       |       |       |       |       |            |
| B3LYP-D3(BJ)                       | 0.448 | 0.604 | 0.846 | 0.604 | 0.846 | 0.604 | 0.846 | 0.785 | 0.764      |
| M06-2X                             | 0.423 | 0.593 | 0.890 | 0.593 | 0.890 | 0.593 | 0.890 | 0.770 | 0.776      |
| $\omega$ B97XD                     | 0.437 | 0.607 | 0.896 | 0.607 | 0.896 | 0.607 | 0.896 | 0.777 | 0.782      |
| <b>Cor-4BN <math>C_s</math></b>    |       |       |       |       |       |       |       |       |            |
| B3LYP-D3(BJ)                       | 0.519 | 0.725 | 0.694 | 0.458 | 0.844 | 0.616 | 0.854 | 0.813 | 0.752      |
| M06-2X                             | 0.504 | 0.718 | 0.697 | 0.430 | 0.889 | 0.611 | 0.899 | 0.801 | 0.758      |
| $\omega$ B97XD                     | 0.518 | 0.729 | 0.710 | 0.449 | 0.898 | 0.624 | 0.908 | 0.809 | 0.765      |
| <b>Cor-5BN <math>C_s</math></b>    |       |       |       |       |       |       |       |       |            |
| B3LYP-D3(BJ)                       | 0.572 | 0.689 | 0.671 | 0.426 | 0.839 | 0.603 | 0.851 | 0.816 | 0.771      |
| M06-2X                             | 0.555 | 0.686 | 0.666 | 0.391 | 0.884 | 0.598 | 0.895 | 0.806 | 0.775      |
| $\omega$ B97XD                     | 0.568 | 0.698 | 0.672 | 0.403 | 0.893 | 0.610 | 0.904 | 0.813 | 0.782      |
| <b>Cor-6BN <math>C_s</math></b>    |       |       |       |       |       |       |       |       |            |
| B3LYP-D3(BJ)                       | 0.680 | 0.725 | 0.695 | 0.650 | 0.656 | 0.479 | 0.821 | 0.848 | 0.772      |
| M06-2X                             | 0.697 | 0.731 | 0.689 | 0.633 | 0.647 | 0.457 | 0.857 | 0.839 | 0.784      |
| $\omega$ B97XD                     | 0.712 | 0.744 | 0.696 | 0.643 | 0.662 | 0.476 | 0.865 | 0.847 | 0.793      |
| <b>Cor-7BN <math>C_s</math></b>    |       |       |       |       |       |       |       |       |            |
| B3LYP-D3(BJ)                       | 0.745 | 0.723 | 0.698 | 0.633 | 0.670 | 0.453 | 0.800 | 0.858 | 0.799      |
| M06-2X                             | 0.764 | 0.731 | 0.695 | 0.622 | 0.666 | 0.428 | 0.831 | 0.851 | 0.807      |
| $\omega$ B97XD                     | 0.781 | 0.745 | 0.703 | 0.634 | 0.674 | 0.439 | 0.840 | 0.858 | 0.818      |
| <b>Cor-8BN <math>C_s</math></b>    |       |       |       |       |       |       |       |       |            |
| B3LYP-D3(BJ)                       | 0.821 | 0.634 | 0.684 | 0.665 | 0.680 | 0.691 | 0.617 | 0.884 | /          |
| M06-2X                             | 0.859 | 0.630 | 0.680 | 0.660 | 0.677 | 0.686 | 0.599 | 0.880 | /          |
| $\omega$ B97XD                     | 0.875 | 0.647 | 0.690 | 0.671 | 0.687 | 0.695 | 0.614 | 0.887 | /          |
| <b>Cor-9BN</b>                     |       |       |       |       |       |       |       |       |            |
| B3LYP-D3(BJ) $D_{3h}$              | 0.872 | 0.677 | 0.677 | 0.677 | 0.677 | 0.677 | 0.677 | 0.914 | /          |
| M06-2X $C_{3h}$                    | 0.906 | 0.673 | 0.673 | 0.673 | 0.673 | 0.673 | 0.673 | 0.916 | /          |
| $\omega$ B97XD $C_{3h}$            | 0.919 | 0.682 | 0.683 | 0.682 | 0.683 | 0.682 | 0.683 | 0.922 | /          |

**Table S3.** Calculated FLU values for individual rings **A-G**, molecular perimeter (**peri**) and perimeter of carbocyclic subunits (**carbo-peri**) of coronene and its BN analogues using different functionals and 6-311+G(d,p) basis set.

|                                                                                    | A      | B      | C      | D      | E      | F      | G      | peri   | carbo-peri |
|------------------------------------------------------------------------------------|--------|--------|--------|--------|--------|--------|--------|--------|------------|
| 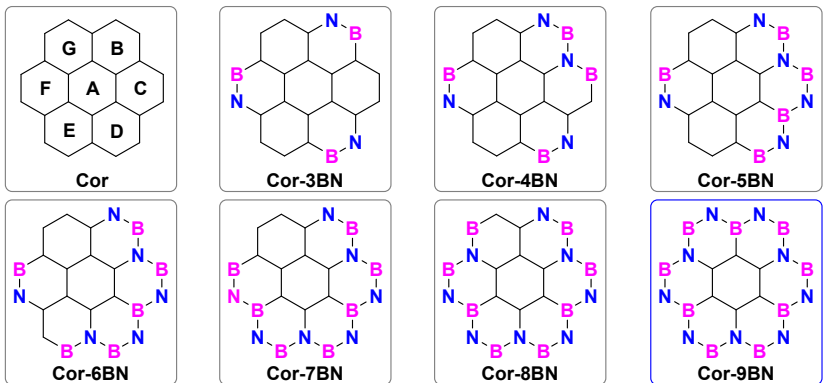 |        |        |        |        |        |        |        |        |            |
| <b>Cor</b>                                                                         |        |        |        |        |        |        |        |        |            |
| B3LYP-D3(BJ) $D_{6h}$                                                              | 0.0265 | 0.0181 | 0.0181 | 0.0181 | 0.0181 | 0.0181 | 0.0181 | 0.0137 | /          |
| M06-2X $D_{6h}$                                                                    | 0.0290 | 0.0184 | 0.0184 | 0.0184 | 0.0184 | 0.0184 | 0.0184 | 0.0159 | /          |
| $\omega$ B97XD $C_{2h}$                                                            | 0.0295 | 0.0183 | 0.0183 | 0.0183 | 0.0183 | 0.0183 | 0.0183 | 0.0163 | /          |
| <b>Cor <math>C_3</math></b>                                                        |        |        |        |        |        |        |        |        |            |
| B3LYP-D3(BJ)                                                                       | 0.0265 | 0.0181 | 0.0181 | 0.0181 | 0.0181 | 0.0181 | 0.0181 | 0.0137 | /          |
| M06-2X                                                                             | 0.0291 | 0.0184 | 0.0184 | 0.0184 | 0.0184 | 0.0184 | 0.0184 | 0.0160 | /          |
| $\omega$ B97XD                                                                     | 0.0295 | 0.0183 | 0.0183 | 0.0183 | 0.0183 | 0.0183 | 0.0183 | 0.0163 | /          |
| <b>Cor-3BN <math>C_{3h}</math></b>                                                 |        |        |        |        |        |        |        |        |            |
| B3LYP-D3(BJ)                                                                       | 0.0294 | 0.0326 | 0.0116 | 0.0326 | 0.0116 | 0.0326 | 0.0116 | 0.0230 | 0.0145     |
| M06-2X                                                                             | 0.0318 | 0.0347 | 0.0108 | 0.0347 | 0.0108 | 0.0347 | 0.0108 | 0.0248 | 0.0148     |
| $\omega$ B97XD                                                                     | 0.0319 | 0.0343 | 0.0106 | 0.0343 | 0.0106 | 0.0343 | 0.0106 | 0.0246 | 0.0148     |
| <b>Cor-4BN <math>C_s</math></b>                                                    |        |        |        |        |        |        |        |        |            |
| B3LYP-D3(BJ)                                                                       | 0.0265 | 0.0271 | 0.0221 | 0.0378 | 0.0115 | 0.0333 | 0.0116 | 0.0208 | 0.0152     |
| M06-2X                                                                             | 0.0282 | 0.0285 | 0.0224 | 0.0408 | 0.0106 | 0.0355 | 0.0107 | 0.0223 | 0.0156     |
| $\omega$ B97XD                                                                     | 0.0282 | 0.0286 | 0.0220 | 0.0404 | 0.0104 | 0.0352 | 0.0105 | 0.0219 | 0.0156     |
| <b>Cor-5BN <math>C_s</math></b>                                                    |        |        |        |        |        |        |        |        |            |
| B3LYP-D3(BJ)                                                                       | 0.0246 | 0.0297 | 0.0311 | 0.0416 | 0.0115 | 0.0337 | 0.0114 | 0.0177 | 0.0144     |
| M06-2X                                                                             | 0.0263 | 0.0310 | 0.0314 | 0.0440 | 0.0107 | 0.0360 | 0.0106 | 0.0185 | 0.0149     |
| $\omega$ B97XD                                                                     | 0.0263 | 0.0311 | 0.0312 | 0.0435 | 0.0105 | 0.0357 | 0.0104 | 0.0185 | 0.0149     |
| <b>Cor-6BN <math>C_s</math></b>                                                    |        |        |        |        |        |        |        |        |            |
| B3LYP-D3(BJ)                                                                       | 0.0207 | 0.0292 | 0.0311 | 0.0321 | 0.0238 | 0.0381 | 0.0124 | 0.0154 | 0.0153     |
| M06-2X                                                                             | 0.0212 | 0.0304 | 0.0314 | 0.0335 | 0.0247 | 0.0409 | 0.0120 | 0.0162 | 0.0158     |
| $\omega$ B97XD                                                                     | 0.0211 | 0.0305 | 0.0312 | 0.0334 | 0.0243 | 0.0406 | 0.0118 | 0.0159 | 0.0157     |
| <b>Cor-7BN <math>C_s</math></b>                                                    |        |        |        |        |        |        |        |        |            |
| B3LYP-D3(BJ)                                                                       | 0.0184 | 0.0293 | 0.0309 | 0.0335 | 0.0312 | 0.0409 | 0.0130 | 0.0119 | 0.0141     |
| M06-2X                                                                             | 0.0186 | 0.0304 | 0.0313 | 0.0347 | 0.0317 | 0.0431 | 0.0128 | 0.0122 | 0.0146     |
| $\omega$ B97XD                                                                     | 0.0184 | 0.0305 | 0.0312 | 0.0346 | 0.0315 | 0.0426 | 0.0127 | 0.0120 | 0.0145     |
| <b>Cor-8BN <math>C_s</math></b>                                                    |        |        |        |        |        |        |        |        |            |
| B3LYP-D3(BJ)                                                                       | 0.0154 | 0.0315 | 0.0319 | 0.0325 | 0.0318 | 0.0307 | 0.0266 | 0.0097 | /          |
| M06-2X                                                                             | 0.0149 | 0.0328 | 0.0325 | 0.0333 | 0.0324 | 0.0317 | 0.0281 | 0.0099 | /          |
| $\omega$ B97XD                                                                     | 0.0147 | 0.0327 | 0.0324 | 0.0332 | 0.0322 | 0.0315 | 0.0279 | 0.0097 | /          |
| <b>Cor-9BN</b>                                                                     |        |        |        |        |        |        |        |        |            |
| B3LYP-D3(BJ) $D_{3h}$                                                              | 0.0135 | 0.0319 | 0.0319 | 0.0319 | 0.0319 | 0.0319 | 0.0319 | 0.0055 | /          |
| M06-2X $C_{3h}$                                                                    | 0.0129 | 0.0327 | 0.0327 | 0.0327 | 0.0327 | 0.0327 | 0.0327 | 0.0052 | /          |
| $\omega$ B97XD $C_{3h}$                                                            | 0.0127 | 0.0326 | 0.0326 | 0.0326 | 0.0326 | 0.0326 | 0.0326 | 0.0051 | /          |

**Table S4.** Calculated PDI ( $\epsilon$ ) values for individual rings A-G of coronene and its BN analogues using different functionals and 6-311+G(d,p) basis set.

|                                                                                    | A      | B      | C      | D      | E      | F      | G      |
|------------------------------------------------------------------------------------|--------|--------|--------|--------|--------|--------|--------|
| 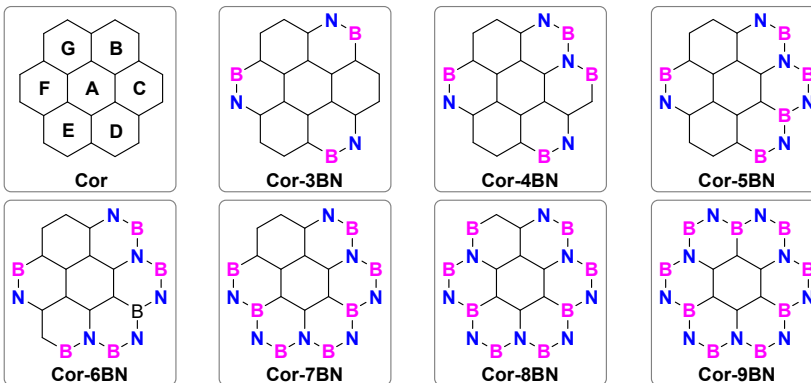 |        |        |        |        |        |        |        |
| <b>Cor</b>                                                                         |        |        |        |        |        |        |        |
| B3LYP-D3(BJ) $D_{6h}$                                                              | 0.0330 | 0.0540 | 0.0540 | 0.0540 | 0.0540 | 0.0540 | 0.0540 |
| M06-2X $D_{6h}$                                                                    | 0.0304 | 0.0561 | 0.0561 | 0.0561 | 0.0561 | 0.0561 | 0.0561 |
| $\omega$ B97XD $C_{2h}$                                                            | 0.0294 | 0.0570 | 0.0570 | 0.0570 | 0.0570 | 0.0570 | 0.0570 |
| <b>Cor <math>C_3</math></b>                                                        |        |        |        |        |        |        |        |
| B3LYP-D3(BJ)                                                                       | 0.0328 | 0.0539 | 0.0539 | 0.0539 | 0.0539 | 0.0539 | 0.0539 |
| M06-2X                                                                             | 0.0303 | 0.0560 | 0.0565 | 0.0560 | 0.0565 | 0.0560 | 0.0565 |
| $\omega$ B97XD                                                                     | 0.0293 | 0.0570 | 0.0570 | 0.0570 | 0.0570 | 0.0570 | 0.0570 |
| <b>Cor-3BN <math>C_{3h}</math></b>                                                 |        |        |        |        |        |        |        |
| B3LYP-D3(BJ)                                                                       | 0.0302 | 0.0339 | 0.0657 | 0.0339 | 0.0657 | 0.0339 | 0.0657 |
| M06-2X                                                                             | 0.0287 | 0.0328 | 0.0693 | 0.0328 | 0.0693 | 0.0328 | 0.0693 |
| $\omega$ B97XD                                                                     | 0.0282 | 0.0329 | 0.0699 | 0.0329 | 0.0699 | 0.0329 | 0.0699 |
| <b>Cor-4BN <math>C_s</math></b>                                                    |        |        |        |        |        |        |        |
| B3LYP-D3(BJ)                                                                       | 0.0358 | 0.0280 | 0.0493 | 0.0275 | 0.0653 | 0.0333 | 0.0653 |
| M06-2X                                                                             | 0.0352 | 0.0267 | 0.0500 | 0.0257 | 0.0687 | 0.0318 | 0.0688 |
| $\omega$ B97XD                                                                     | 0.0350 | 0.0265 | 0.0506 | 0.0257 | 0.0695 | 0.0318 | 0.0695 |
| <b>Cor-5BN <math>C_s</math></b>                                                    |        |        |        |        |        |        |        |
| B3LYP-D3(BJ)                                                                       | 0.0400 | 0.0256 | 0.0313 | 0.0246 | 0.0651 | 0.0327 | 0.0655 |
| M06-2X                                                                             | 0.0396 | 0.0245 | 0.0307 | 0.0229 | 0.0683 | 0.0312 | 0.0688 |
| $\omega$ B97XD                                                                     | 0.0395 | 0.0242 | 0.0309 | 0.0230 | 0.0690 | 0.0310 | 0.0694 |
| <b>Cor-6BN <math>C_s</math></b>                                                    |        |        |        |        |        |        |        |
| B3LYP-D3(BJ)                                                                       | 0.0473 | 0.0261 | 0.0295 | 0.0248 | 0.0453 | 0.0273 | 0.0633 |
| M06-2X                                                                             | 0.0484 | 0.0250 | 0.0288 | 0.0231 | 0.0453 | 0.0253 | 0.0658 |
| $\omega$ B97XD                                                                     | 0.0487 | 0.0247 | 0.0289 | 0.0231 | 0.0457 | 0.0252 | 0.0663 |
| <b>Cor-7BN <math>C_s</math></b>                                                    |        |        |        |        |        |        |        |
| B3LYP-D3(BJ)                                                                       | 0.0522 | 0.0263 | 0.0290 | 0.0237 | 0.0286 | 0.0253 | 0.0625 |
| M06-2X                                                                             | 0.0536 | 0.0251 | 0.0281 | 0.0223 | 0.0277 | 0.0235 | 0.0646 |
| $\omega$ B97XD                                                                     | 0.0540 | 0.0249 | 0.0281 | 0.0223 | 0.0278 | 0.0236 | 0.0649 |
| <b>Cor-8BN <math>C_s</math></b>                                                    |        |        |        |        |        |        |        |
| B3LYP-D3(BJ)                                                                       | 0.0575 | 0.0240 | 0.0269 | 0.0253 | 0.0268 | 0.0270 | 0.0405 |
| M06-2X                                                                             | 0.0597 | 0.0230 | 0.0258 | 0.0241 | 0.0256 | 0.0256 | 0.0395 |
| $\omega$ B97XD                                                                     | 0.0603 | 0.0229 | 0.0258 | 0.0241 | 0.0257 | 0.0256 | 0.0397 |
| <b>Cor-9BN</b>                                                                     |        |        |        |        |        |        |        |
| B3LYP-D3(BJ) $D_{3h}$                                                              | 0.0612 | 0.0260 | 0.0260 | 0.0260 | 0.0260 | 0.0260 | 0.0260 |
| M06-2X $C_{3h}$                                                                    | 0.0633 | 0.0204 | 0.0249 | 0.0204 | 0.0249 | 0.0244 | 0.0249 |
| $\omega$ B97XD $C_{3h}$                                                            | 0.0638 | 0.0249 | 0.0249 | 0.0249 | 0.0249 | 0.0249 | 0.0249 |

**Table S5.** Calculated EDDB<sub>p</sub> (e) values for individual rings **A-G**, molecular primeter (**peri**) and perimeter of carbocyclic subunits (**carbo-peri**) of coronene and its BN analogues using different functionals and 6-311+G(d,p) basis set.

|                                    | A      | B      | C      | D      | E      | F      | G      | peri   | carbo-peri |
|------------------------------------|--------|--------|--------|--------|--------|--------|--------|--------|------------|
|                                    |        |        |        |        |        |        |        |        |            |
| <b>Cor</b>                         |        |        |        |        |        |        |        |        |            |
| B3LYP $D_{6h}$                     | 2.5736 | 2.6959 | 2.6959 | 2.6959 | 2.6959 | 2.6959 | 2.6959 | 8.3128 | /          |
| M06-2X $D_{6h}$                    | 2.4243 | 2.5328 | 2.5328 | 2.5328 | 2.5328 | 2.5328 | 2.5328 | 7.5158 | /          |
| $\omega$ B97XD $C_{2h}$            | 2.3764 | 2.4948 | 2.4948 | 2.4948 | 2.4948 | 2.4948 | 2.4948 | 7.3593 | /          |
| <b>Cor <math>C_3</math></b>        |        |        |        |        |        |        |        |        |            |
| B3LYP                              | 2.5744 | 2.6971 | 2.6962 | 2.6971 | 2.6962 | 2.6971 | 2.6962 | 8.3170 | /          |
| M06-2X                             | 2.4175 | 2.5608 | 2.5288 | 2.5608 | 2.5288 | 2.5608 | 2.5288 | 7.5085 | /          |
| $\omega$ B97XD                     | 2.3745 | 2.4903 | 2.4948 | 2.4903 | 2.4948 | 2.4903 | 2.4948 | 7.3513 | /          |
| <b>Cor-3BN <math>C_{3h}</math></b> |        |        |        |        |        |        |        |        |            |
| B3LYP                              | 2.0596 | 1.8013 | 3.7144 | 1.8013 | 3.7144 | 1.8013 | 3.7144 | 7.7155 | 10.6958    |
| M06-2X                             | 1.7198 | 1.5012 | 3.8379 | 1.5012 | 3.8379 | 1.5012 | 3.8379 | 7.2061 | 10.4514    |
| $\omega$ B97XD                     | 1.6609 | 1.4809 | 3.8357 | 1.4809 | 3.8357 | 1.4809 | 3.8357 | 7.1944 | 10.3483    |
| <b>Cor-4BN <math>C_s</math></b>    |        |        |        |        |        |        |        |        |            |
| B3LYP                              | 2.1762 | 2.1556 | 2.2320 | 1.7561 | 3.7593 | 1.8603 | 3.7324 | 7.4600 | 8.0344     |
| M06-2X                             | 1.8545 | 1.9825 | 2.0857 | 1.5363 | 3.8940 | 1.6053 | 3.8679 | 6.9998 | 7.8119     |
| $\omega$ B97XD                     | 1.7831 | 1.9512 | 2.0933 | 1.5294 | 3.9013 | 1.5837 | 3.8746 | 7.0066 | 7.7252     |
| <b>Cor-5BN <math>C_s</math></b>    |        |        |        |        |        |        |        |        |            |
| B3LYP                              | 2.1881 | 2.0258 | 1.8791 | 1.7254 | 3.7500 | 1.8673 | 3.7832 | 8.2172 | 8.1441     |
| M06-2X                             | 1.8941 | 1.8975 | 1.8151 | 1.5627 | 3.8790 | 1.6349 | 3.9111 | 7.9326 | 7.9639     |
| $\omega$ B97XD                     | 1.8307 | 1.8644 | 1.8080 | 1.5727 | 3.8857 | 1.6191 | 3.9127 | 7.9104 | 7.8968     |
| <b>Cor-6BN <math>C_s</math></b>    |        |        |        |        |        |        |        |        |            |
| B3LYP                              | 2.6866 | 2.0376 | 1.9476 | 2.1974 | 2.1293 | 1.7990 | 3.7171 | 7.9959 | 5.6509     |
| M06-2X                             | 2.4886 | 1.9451 | 1.8673 | 2.0912 | 1.9403 | 1.6194 | 3.7061 | 7.6249 | 5.4130     |
| $\omega$ B97XD                     | 2.4379 | 1.9149 | 1.8587 | 2.0974 | 1.9385 | 1.6236 | 3.7024 | 7.6362 | 5.3560     |
| <b>Cor-7BN <math>C_s</math></b>    |        |        |        |        |        |        |        |        |            |
| B3LYP                              | 2.9830 | 2.0632 | 1.9533 | 2.0871 | 1.9361 | 1.7779 | 3.5402 | 8.8023 | 5.8141     |
| M06-2X                             | 2.8162 | 1.9755 | 1.8665 | 1.9922 | 1.8500 | 1.6418 | 3.4694 | 8.5448 | 5.5676     |
| $\omega$ B97XD                     | 2.7955 | 1.9456 | 1.8595 | 1.9848 | 1.8434 | 1.6557 | 3.4524 | 8.5222 | 5.5307     |
| <b>Cor-8BN <math>C_s</math></b>    |        |        |        |        |        |        |        |        |            |
| B3LYP                              | 3.5656 | 1.9204 | 1.9678 | 2.0228 | 1.9876 | 2.1433 | 1.9864 | 8.6439 | /          |
| M06-2X                             | 3.6405 | 1.8182 | 1.8771 | 1.9273 | 1.8962 | 2.0341 | 1.7919 | 8.4322 | /          |
| $\omega$ B97XD                     | 3.6334 | 1.8017 | 1.8683 | 1.9199 | 1.8870 | 2.0349 | 1.7859 | 8.4265 | /          |
| <b>Cor-9BN</b>                     |        |        |        |        |        |        |        |        |            |
| B3LYP $D_{3h}$                     | 2.8491 | 2.0033 | 2.0033 | 2.0033 | 2.0033 | 2.0033 | 2.0033 | 9.7073 | /          |
| M06-2X $C_{3h}$                    | 3.9477 | 1.9069 | 1.9100 | 1.9069 | 1.9100 | 1.9069 | 1.9100 | 9.5941 | /          |
| $\omega$ B97XD $C_{3h}$            | 3.9429 | 1.8990 | 1.9029 | 1.8990 | 1.9029 | 1.8990 | 1.9029 | 9.5668 | /          |

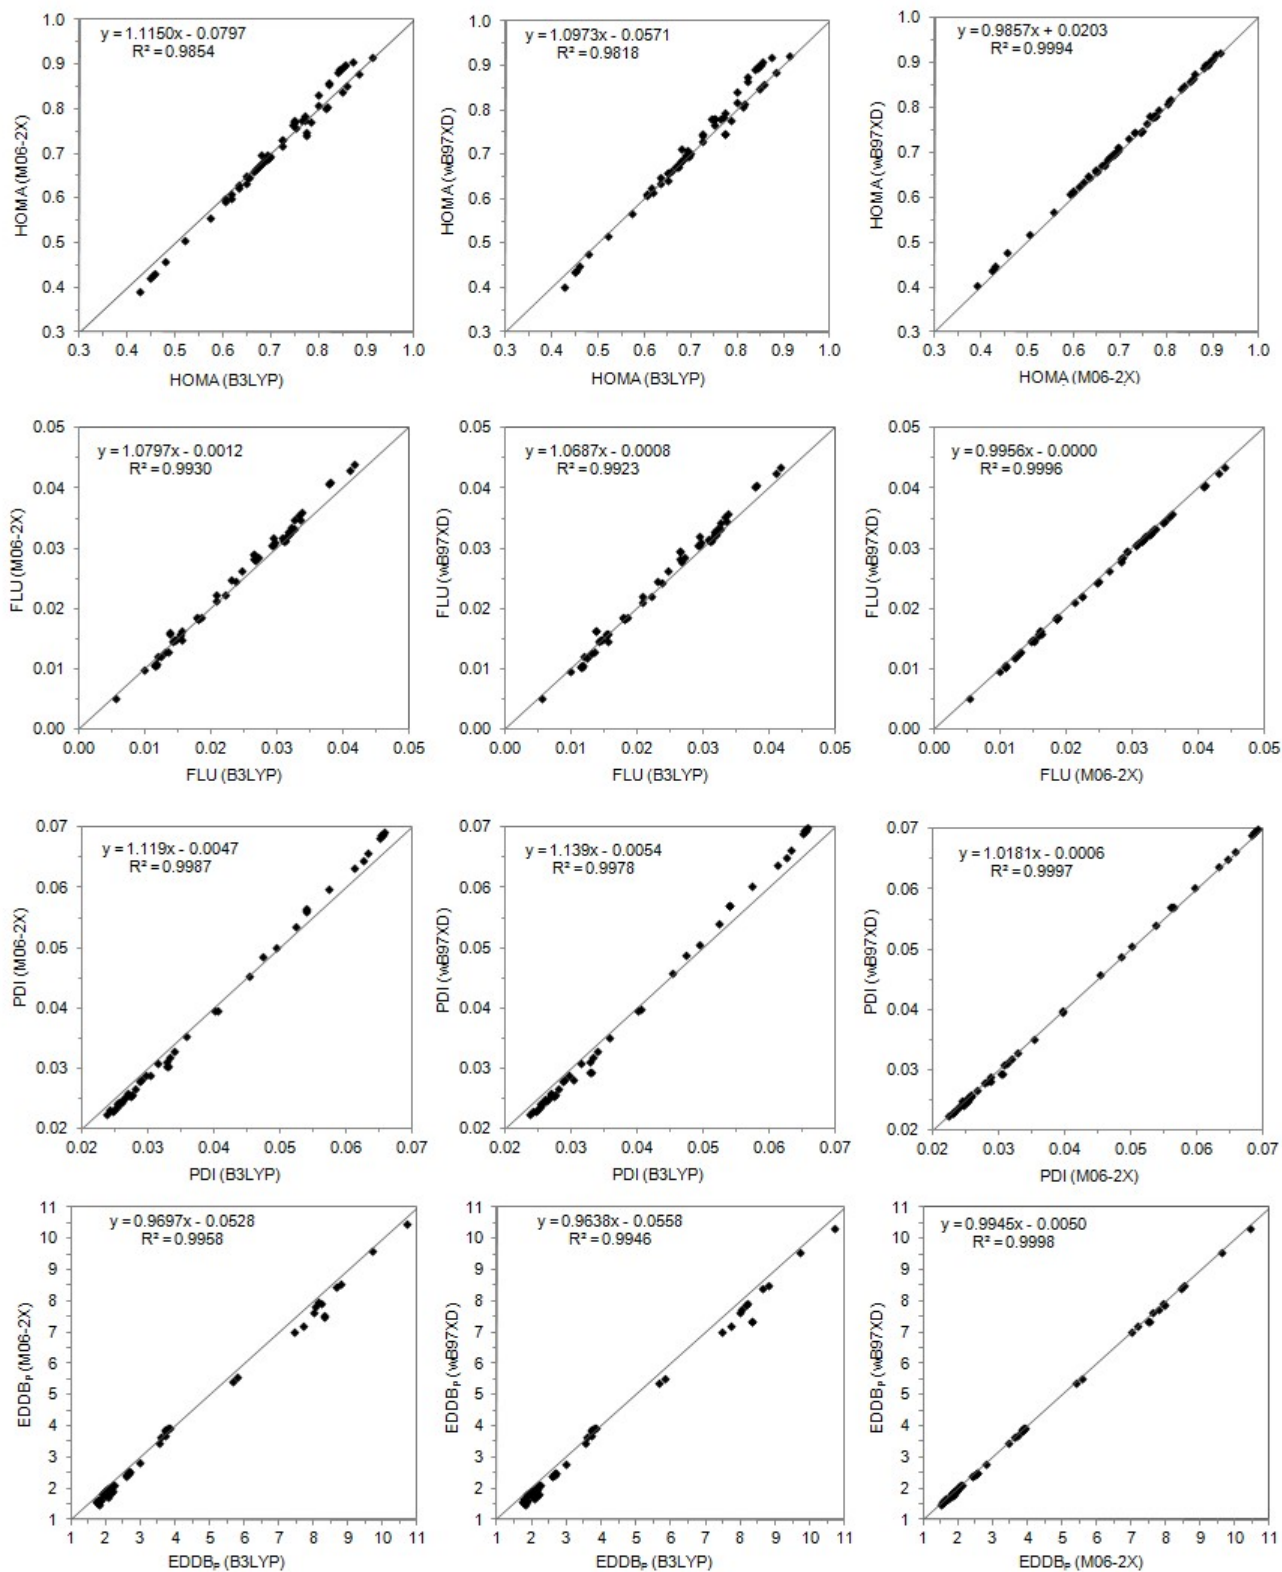

Figure S1. Correlations of HOMA, FLU, PDI and EDDB<sub>p</sub> calculated using different functionals.

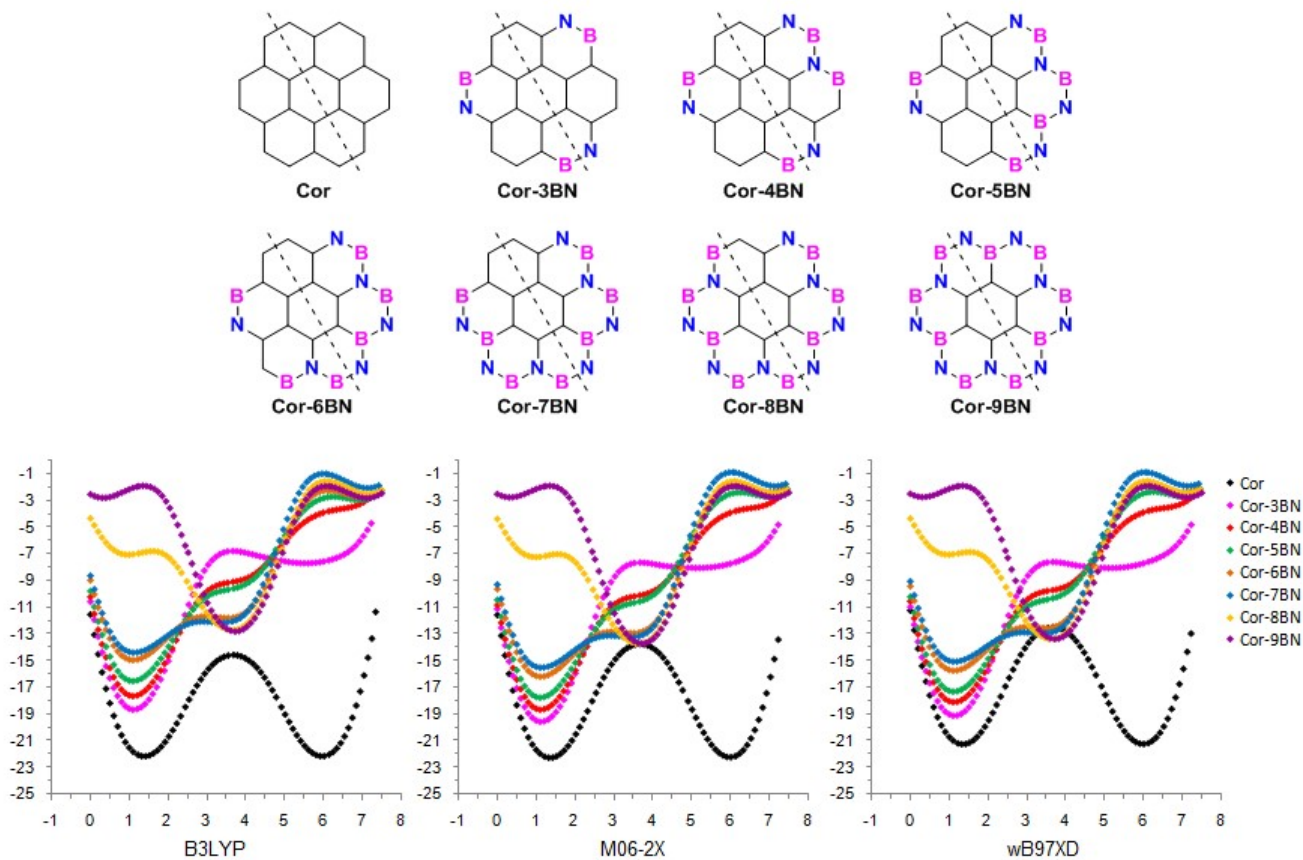

**Figure S2.** NICS $_{\pi zz}$ -xy scans of coronene and its BN analogues calculated using different functionals and 6-311+G(d,p) basis set. The scan direction was along the dashed line starting from the upper-left ring. Distance from the ring plane was 1.7 Å. The x-axis shows the distance (Å) from the first Bq atom and the y-axis represents the NICS values (ppm). In the structures, the hydrogen atoms and double bonds are omitted.



## S2. Comparison of the performance of different aromaticity indices

Figure S3 presents the correlation between the different electronic indices used in this work (FLU, PDI and EDDB<sub>p</sub>), as well as between the electronic and structural HOMA indices, obtained at the  $\omega$ B97XD/6-311+G(d,p) level of theory. Correlations were made separately for the central benzene ring, outer benzene, molecular perimeter and BN rings. The corresponding values can be found Table S6 and the correlation coefficients are also collected in Table S7. The data reveal that aromaticity of the outer benzene of the studied compounds is best described by the indices used, followed by the central ring. For the latter, the outlier point in the correlation graphs in Figure S3 belongs to coronene for all but PDI/FLU and EDDB/HOMA correlations. The two groups disagree on the degree of its aromaticity: either PDI and FLU underestimate it, or EDDB and HOMA overestimate it. We conclude that the central benzene of coronene is more influenced by the surrounding six rings than the more aromatic outer ring and is therefore more difficult to describe it with aromaticity indices. Nevertheless, a careful analysis of the numerical data shows that all indices show the same numerical trend for both type of benzene rings and can be considered safe for monitoring changes in the aromaticity of these rings. When the central ring of coronene is excluded from the correlation, the  $R^2$  values become 0.9989 (PDI/FLU), 0.9364 (EDDB/FLU), 0.9230 (EDDB/PDI), 0.9981 (PDI/HOMA), 0.9991 (FLU/HOMA) and 0.9367 (EDDB/HOMA). Therefore, replacing the peripheral CC bonds with BN bonds reduces the effects of the outer rings on the central ring, so that its aromaticity becomes easier to describe.

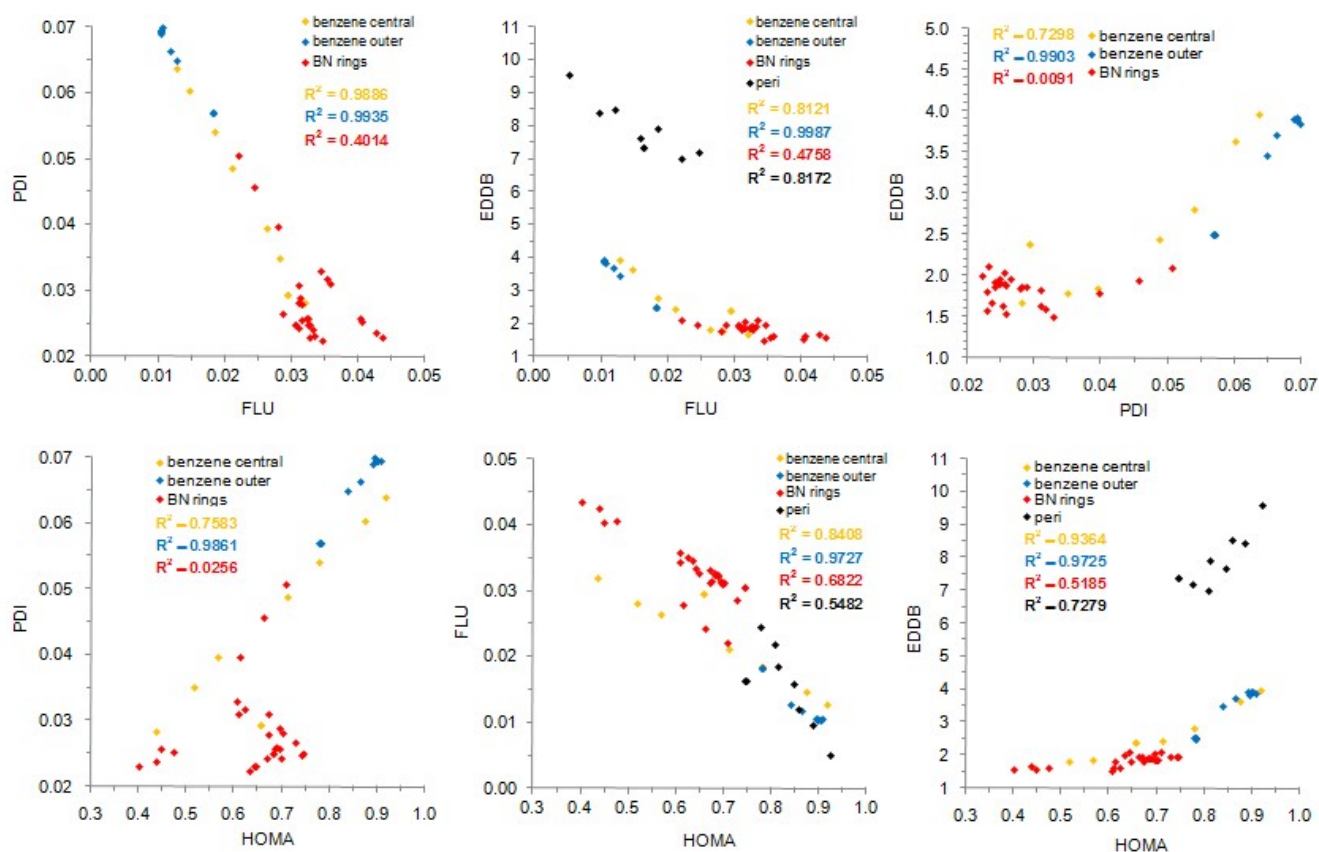

Figure S3. Correlations between different aromaticity indices calculated at the  $\omega$ B97XD/6-311+G(d,p) level of theory.

**Table S6.** Calculated HOMA, FLU, PDI (e), EDDB<sub>p</sub> (e) and NICS(1.7)<sub>πzz</sub> (ppm) values for individual rings **A-G**, molecular perimeter (**peri**) and perimeter of carbocyclic subunits (**carbo-peri**) of coronene and its BN analogues at the wB97XD/6-311+G(d,p) level of theory.<sup>a</sup>

| 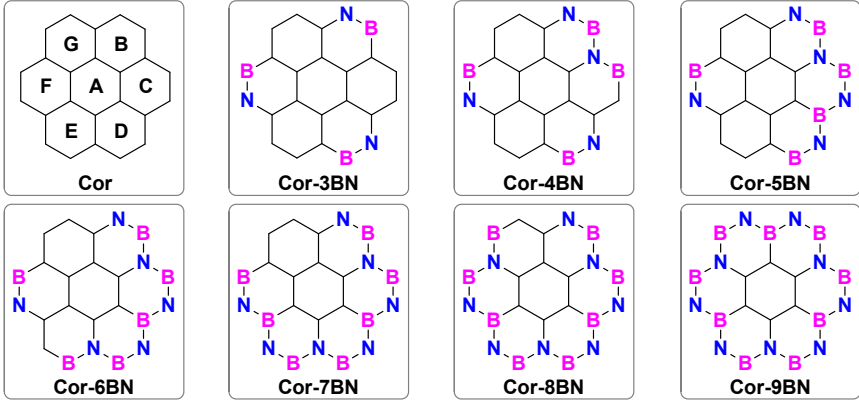 |        |        |        |        |        |        |        |        |               |
|------------------------------------------------------------------------------------|--------|--------|--------|--------|--------|--------|--------|--------|---------------|
| HOMA                                                                               | A      | B      | C      | D      | E      | F      | G      | peri   | carbo-peri    |
| Cor                                                                                | 0.657  | 0.782  | 0.782  | 0.782  | 0.782  | 0.782  | 0.782  | 0.746  | /             |
| Cor-3BN                                                                            | 0.437  | 0.607  | 0.896  | 0.607  | 0.896  | 0.607  | 0.896  | 0.777  | 0.782         |
| Cor-4BN                                                                            | 0.518  | 0.729  | 0.710  | 0.449  | 0.898  | 0.624  | 0.908  | 0.809  | 0.765         |
| Cor-5BN                                                                            | 0.568  | 0.698  | 0.672  | 0.403  | 0.893  | 0.610  | 0.904  | 0.813  | 0.782         |
| Cor-6BN                                                                            | 0.712  | 0.744  | 0.696  | 0.643  | 0.662  | 0.476  | 0.865  | 0.847  | 0.793         |
| Cor-7BN                                                                            | 0.781  | 0.745  | 0.703  | 0.634  | 0.674  | 0.439  | 0.840  | 0.858  | 0.818         |
| Cor-8BN                                                                            | 0.875  | 0.647  | 0.690  | 0.671  | 0.687  | 0.695  | 0.614  | 0.887  | /             |
| Cor-9BN                                                                            | 0.919  | 0.682  | 0.683  | 0.682  | 0.683  | 0.682  | 0.683  | 0.922  | /             |
| FLU                                                                                | A      | B      | C      | D      | E      | F      | G      | peri   | carbo-peri    |
| Cor                                                                                | 0.0295 | 0.0183 | 0.0183 | 0.0183 | 0.0183 | 0.0183 | 0.0183 | 0.0163 | /             |
| Cor-3BN                                                                            | 0.0319 | 0.0343 | 0.0106 | 0.0343 | 0.0106 | 0.0343 | 0.0106 | 0.0246 | 0.0148        |
| Cor-4BN                                                                            | 0.0282 | 0.0286 | 0.0220 | 0.0404 | 0.0104 | 0.0352 | 0.0105 | 0.0219 | 0.0156        |
| Cor-5BN                                                                            | 0.0263 | 0.0311 | 0.0312 | 0.0435 | 0.0105 | 0.0357 | 0.0104 | 0.0185 | 0.0149        |
| Cor-6BN                                                                            | 0.0211 | 0.0305 | 0.0312 | 0.0334 | 0.0243 | 0.0406 | 0.0118 | 0.0159 | 0.0157        |
| Cor-7BN                                                                            | 0.0184 | 0.0305 | 0.0312 | 0.0346 | 0.0315 | 0.0426 | 0.0127 | 0.0120 | 0.0145        |
| Cor-8BN                                                                            | 0.0147 | 0.0327 | 0.0324 | 0.0332 | 0.0322 | 0.0315 | 0.0279 | 0.0097 | /             |
| Cor-9BN                                                                            | 0.0127 | 0.0326 | 0.0326 | 0.0326 | 0.0326 | 0.0326 | 0.0326 | 0.0051 | /             |
| PDI                                                                                | A      | B      | C      | D      | E      | F      | G      |        |               |
| Cor                                                                                | 0.0294 | 0.0570 | 0.0570 | 0.0570 | 0.0570 | 0.0570 | 0.0570 |        |               |
| Cor-3BN                                                                            | 0.0282 | 0.0329 | 0.0699 | 0.0329 | 0.0699 | 0.0329 | 0.0699 |        |               |
| Cor-4BN                                                                            | 0.0350 | 0.0265 | 0.0506 | 0.0257 | 0.0695 | 0.0318 | 0.0695 |        |               |
| Cor-5BN                                                                            | 0.0395 | 0.0242 | 0.0309 | 0.0230 | 0.0690 | 0.0310 | 0.0694 |        |               |
| Cor-6BN                                                                            | 0.0487 | 0.0247 | 0.0289 | 0.0231 | 0.0457 | 0.0252 | 0.0663 |        |               |
| Cor-7BN                                                                            | 0.0540 | 0.0249 | 0.0281 | 0.0223 | 0.0278 | 0.0236 | 0.0649 |        |               |
| Cor-8BN                                                                            | 0.0603 | 0.0229 | 0.0258 | 0.0241 | 0.0257 | 0.0256 | 0.0397 |        |               |
| Cor-9BN                                                                            | 0.0638 | 0.0249 | 0.0249 | 0.0249 | 0.0249 | 0.0249 | 0.0249 |        |               |
| EDDB <sub>p</sub>                                                                  | A      | B      | C      | D      | E      | F      | G      | peri   | carbo-peri    |
| Cor                                                                                | 2.3764 | 2.4948 | 2.4948 | 2.4948 | 2.4948 | 2.4948 | 2.4948 | 7.3593 | /             |
| Cor-3BN                                                                            | 1.6609 | 1.4809 | 3.8357 | 1.4809 | 3.8357 | 1.4809 | 3.8357 | 7.1944 | 10.3483 (57%) |
| Cor-4BN                                                                            | 1.7831 | 1.9512 | 2.0933 | 1.5294 | 3.9013 | 1.5837 | 3.8746 | 7.0066 | 7.7252 (55%)  |
| Cor-5BN                                                                            | 1.8307 | 1.8644 | 1.8080 | 1.5727 | 3.8857 | 1.6191 | 3.9127 | 7.9104 | 7.8968 (56%)  |
| Cor-6BN                                                                            | 2.4379 | 1.9149 | 1.8587 | 2.0974 | 1.9385 | 1.6236 | 3.7024 | 7.6362 | 5.3560 (54%)  |
| Cor-7BN                                                                            | 2.7955 | 1.9456 | 1.8595 | 1.9848 | 1.8434 | 1.6557 | 3.4524 | 8.5222 | 5.5307 (55%)  |
| Cor-8BN                                                                            | 3.6334 | 1.8017 | 1.8683 | 1.9199 | 1.8870 | 2.0349 | 1.7859 | 8.4265 | /             |
| Cor-9BN                                                                            | 3.9429 | 1.8990 | 1.9029 | 1.8990 | 1.9029 | 1.8990 | 1.9029 | 9.5668 | /             |
| NICS(1.7) <sub>πzz</sub>                                                           | A      | B      | C      | D      | E      | F      | G      |        |               |

|                |        |        |        |        |        |        |        |  |  |
|----------------|--------|--------|--------|--------|--------|--------|--------|--|--|
| <b>Cor</b>     | -12.46 | -21.17 | -21.17 | -21.17 | -21.17 | -21.17 | -21.17 |  |  |
| <b>Cor-3BN</b> | -7.58  | -7.46  | -19.08 | -7.46  | -19.08 | -7.46  | -19.08 |  |  |
| <b>Cor-4BN</b> | -9.70  | -2.15  | -11.17 | -3.76  | -18.49 | -6.84  | -18.07 |  |  |
| <b>Cor-5BN</b> | -10.32 | 0.54   | -3.66  | -2.40  | -17.94 | -6.53  | -17.24 |  |  |
| <b>Cor-6BN</b> | -12.49 | 0.31   | -2.96  | -1.88  | -9.33  | -3.29  | -15.72 |  |  |
| <b>Cor-7BN</b> | -12.89 | -0.09  | -2.38  | -0.93  | -3.17  | -2.86  | -15.06 |  |  |
| <b>Cor-8BN</b> | -13.32 | 0.12   | -1.94  | -1.60  | -2.22  | -2.62  | -6.95  |  |  |
| <b>Cor-9BN</b> | -13.36 | -1.88  | -1.89  | -1.88  | -1.89  | -1.88  | -1.89  |  |  |

<sup>a</sup> Percent values correspond to the number of delocalized electrons with respect to the total number of  $\pi$ -electrons.

**Table S7.** Correlation coefficients between various aromaticity indices, calculated at the  $\omega$ B97XD/6-311+G(d,p) level of theory.

|                      | PDI/FLU | EDDB/FLU | EDDB/PDI | PDI/HOMA | FLU/HOMA | EDDB/HOMA |
|----------------------|---------|----------|----------|----------|----------|-----------|
| Central benzene ring | 0.9886  | 0.8121   | 0.7298   | 0.7583   | 0.8408   | 0.9364    |
| Outer benzene ring   | 0.9935  | 0.9987   | 0.9903   | 0.9861   | 0.9727   | 0.9725    |
| BN rings             | 0.4014  | 0.4758   | 0.0091   | 0.0256   | 0.6822   | 0.5185    |
| Molecular perimeter  | /       | 0.8172   | /        | /        | 0.5482   | 0.7279    |

Table S7 and Figure S3 show that the agreement between the indices used to quantify aromaticity of molecular perimeter is worse. In particular, the effect of introduction of the first three BN units on peripheral aromaticity is described in the same way by FLU and EDDB, but differently by HOMA. Then, in BN coronenes, HOMA and FLU show the same trend with  $R^2 = 0.9749$ , while EDDB slightly disagrees showing some fluctuations in aromaticity (Table S6).

It is generally accepted that aromaticity of benzene consistently decreases with increasing number of BN units replacing its CC bonds. This change is attributed to electronegativity differences between boron, nitrogen and carbon atoms.<sup>2</sup> The agreement between the indices used to quantify the aromaticity of the BN rings of the studied compounds vary from poor (EDDB/PDI, HOMA/PDI and FLU/PDI) to moderate (EDDB/FLU, EDDB/HOMA and FLU/HOMA). Thus, the reduced aromaticity of the peripheral coronene rings after BN substitution, with subtle differences between them, appears to be better described by HOMA, FLU and EDDB, although there are linear PDI/FLU and PDI/HOMA correlations for a certain number of compounds (Figure S3).

**Table S8.** Calculated HOMA, FLU, PDI (e), EDDB<sub>p</sub> (e) and NICS(1.7)<sub>πzz</sub> (ppm) values for isolated reference carbocyclic compounds at the ωB97XD/6-311+G(d,p) level of theory. Carbocyclic subunits are marked with thick bonds in each BN-coronene.<sup>a</sup>

|                                                                                                                                |                                                                                   |                                                                                    |                                                                                     |          |          |          |          |                   |
|--------------------------------------------------------------------------------------------------------------------------------|-----------------------------------------------------------------------------------|------------------------------------------------------------------------------------|-------------------------------------------------------------------------------------|----------|----------|----------|----------|-------------------|
| 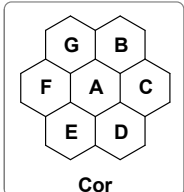                                              |  |  |  |          |          |          |          |                   |
|                                               |  |  |  |          |          |          |          |                   |
| <b>HOMA</b>                                                                                                                    | <b>A</b>                                                                          | <b>B</b>                                                                           | <b>C</b>                                                                            | <b>D</b> | <b>E</b> | <b>F</b> | <b>G</b> | <b>carbo-peri</b> |
| Triphenylene                                                                                                                   | 0.128                                                                             | /                                                                                  | 0.936                                                                               | /        | 0.936    | /        | 0.936    | 0.682             |
| Phenanthrene                                                                                                                   | 0.482                                                                             | /                                                                                  | /                                                                                   | /        | 0.905    | /        | 0.905    | 0.745             |
| Naphthalene                                                                                                                    | 0.811                                                                             | /                                                                                  | /                                                                                   | /        | /        | /        | 0.811    | 0.830             |
| Benzene                                                                                                                        | 0.998                                                                             | /                                                                                  | /                                                                                   | /        | /        | /        | /        | 0.998             |
| <b>FLU</b>                                                                                                                     | <b>A</b>                                                                          | <b>B</b>                                                                           | <b>C</b>                                                                            | <b>D</b> | <b>E</b> | <b>F</b> | <b>G</b> | <b>carbo-peri</b> |
| Triphenylene                                                                                                                   | 0.0335                                                                            | /                                                                                  | 0.0051                                                                              | /        | 0.0051   | /        | 0.0051   | 0.0126            |
| Phenanthrene                                                                                                                   | 0.0263                                                                            | /                                                                                  | /                                                                                   | /        | 0.0071   | /        | 0.0071   | 0.0131            |
| Naphthalene                                                                                                                    | 0.0118                                                                            | /                                                                                  | /                                                                                   | /        | /        | /        | 0.0118   | 0.0100            |
| Benzene                                                                                                                        | 0.0000                                                                            | /                                                                                  | /                                                                                   | /        | /        | /        | /        | 0.0000            |
| <b>PDI</b>                                                                                                                     | <b>A</b>                                                                          | <b>B</b>                                                                           | <b>C</b>                                                                            | <b>D</b> | <b>E</b> | <b>F</b> | <b>G</b> |                   |
| Triphenylene                                                                                                                   | 0.0293                                                                            | /                                                                                  | 0.0882                                                                              | /        | 0.0882   | /        | 0.0882   | /                 |
| Phenanthrene                                                                                                                   | 0.0483                                                                            | /                                                                                  | /                                                                                   | /        | 0.0842   | /        | 0.0842   | /                 |
| Naphthalene                                                                                                                    | 0.0772                                                                            | /                                                                                  | /                                                                                   | /        | /        | /        | 0.0772   | /                 |
| Benzene                                                                                                                        | 0.1045                                                                            | /                                                                                  | /                                                                                   | /        | /        | /        | /        | /                 |
| <b>EDDB<sub>p</sub></b>                                                                                                        | <b>A</b>                                                                          | <b>B</b>                                                                           | <b>C</b>                                                                            | <b>D</b> | <b>E</b> | <b>F</b> | <b>G</b> | <b>carbo-peri</b> |
| Triphenylene                                                                                                                   | 0.7747                                                                            | /                                                                                  | 4.3838                                                                              | /        | 4.3838   | /        | 4.3838   | 10.2968 (57%)     |
| Phenanthrene                                                                                                                   | 1.3965                                                                            | /                                                                                  | /                                                                                   | /        | 3.9659   | /        | 3.9659   | 7.3359 (52%)      |
| Naphthalene                                                                                                                    | 3.0415                                                                            | /                                                                                  | /                                                                                   | /        | /        | /        | 3.0415   | 5.3350 (53%)      |
| Benzene                                                                                                                        | 5.4812                                                                            | /                                                                                  | /                                                                                   | /        | /        | /        | /        | 5.4812 (91%)      |
| <b>NICS(1.7)<sub>πzz</sub></b>                                                                                                 | <b>A</b>                                                                          | <b>B</b>                                                                           | <b>C</b>                                                                            | <b>D</b> | <b>E</b> | <b>F</b> | <b>G</b> |                   |
| Triphenylene                                                                                                                   | -9.36                                                                             | /                                                                                  | -16.38                                                                              | /        | -16.38   | /        | -16.38   |                   |
| Phenanthrene                                                                                                                   | -14.20                                                                            | /                                                                                  | /                                                                                   | /        | -18.01   | /        | -18.01   |                   |
| Naphthalene                                                                                                                    | -18.13                                                                            | /                                                                                  | /                                                                                   | /        | /        | /        | -18.13   |                   |
| Benzene                                                                                                                        | -17.77                                                                            | /                                                                                  | /                                                                                   | /        | /        | /        | /        |                   |
| <sup>a</sup> Percent values correspond to the number of delocalized electrons with respect to the total number of π-electrons. |                                                                                   |                                                                                    |                                                                                     |          |          |          |          |                   |

**Table S9.** Energies (eV) of HOMO and LUMO orbitals and their difference (HOMO-LUMO energy gap) calculated with different functionals and 6-311+G(d,p) basis set.

|                     | B3LYP-D3(BJ) |       |             | M06-2X |       |             | $\omega$ B97XD |       |              |
|---------------------|--------------|-------|-------------|--------|-------|-------------|----------------|-------|--------------|
|                     | HOMO         | LUMO  | energy gap  | HOMO   | LUMO  | energy gap  | HOMO           | LUMO  | energy gap   |
| <b>Cor</b>          | -5.78        | -1.77 | <b>4.01</b> | -6.88  | -1.03 | <b>5.84</b> | -7.45          | -0.14 | <b>7.31</b>  |
| <b>Cor-3BN</b>      | -5.87        | -1.60 | <b>4.27</b> | -6.99  | -0.78 | <b>6.21</b> | -7.60          | 0.11  | <b>7.71</b>  |
| <b>Cor-4BN</b>      | -5.56        | -1.90 | <b>3.66</b> | -6.63  | -1.08 | <b>5.54</b> | -7.26          | -0.21 | <b>7.05</b>  |
| <b>Cor-5BN</b>      | -5.49        | -1.76 | <b>3.73</b> | -6.56  | -0.93 | <b>5.63</b> | -7.18          | -0.05 | <b>7.13</b>  |
| <b>Cor-6BN</b>      | -5.41        | -1.87 | <b>3.54</b> | -6.47  | -1.04 | <b>5.43</b> | -7.11          | -0.16 | <b>6.95</b>  |
| <b>Cor-7BN</b>      | -5.49        | -1.61 | <b>3.88</b> | -6.56  | -0.74 | <b>5.82</b> | -7.21          | 0.15  | <b>7.35</b>  |
| <b>Cor-8BN</b>      | -5.79        | -1.38 | <b>4.41</b> | -6.94  | -0.48 | <b>6.46</b> | -7.60          | 0.41  | <b>8.01</b>  |
| <b>Cor-9BN</b>      | -6.15        | -0.89 | <b>5.26</b> | -7.34  | -0.12 | <b>7.22</b> | -7.99          | 0.95  | <b>8.94</b>  |
| <b>benzene</b>      | -7.08        | -0.47 | <b>6.61</b> | -8.42  | 0.45  | <b>8.88</b> | -9.08          | 1.46  | <b>10.54</b> |
| <b>naphthalene</b>  | -6.15        | -1.39 | <b>4.75</b> | -7.38  | -0.49 | <b>6.89</b> | -8.02          | 0.44  | <b>8.46</b>  |
| <b>phenanthrene</b> | -6.09        | -1.40 | <b>4.69</b> | -7.30  | -0.52 | <b>6.78</b> | -7.93          | 0.40  | <b>8.33</b>  |
| <b>triphenylene</b> | -6.20        | -1.36 | <b>4.84</b> | -7.41  | -0.51 | <b>6.90</b> | -8.03          | 0.42  | <b>8.46</b>  |

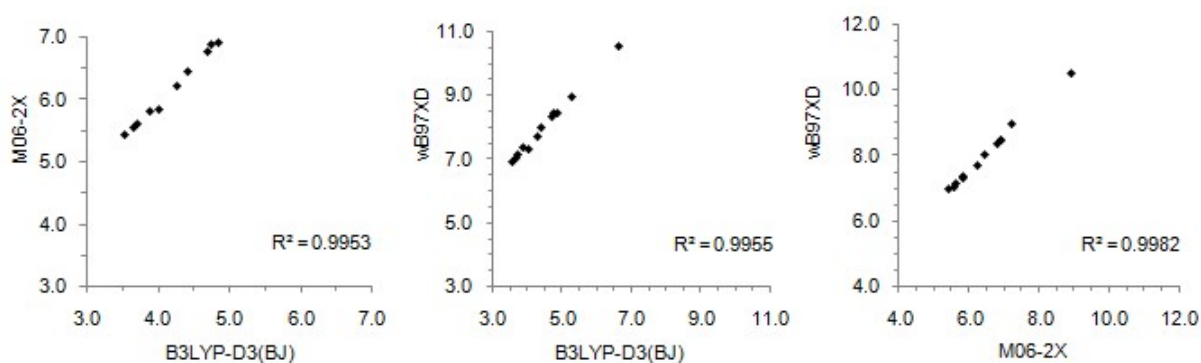

**Figure S4.** Correlations between HOMO-LUMO gaps calculated with different functionals and 6-311+G(d,p) basis set.

## References

1. T. M. Krygowski, M. Cyrański, A. Ciesielski, B. Świrski, P. Leszczyński, Separation of the Energetic and Geometric Contributions to Aromaticity. 2. Analysis of the Aromatic Character of Benzene Rings in Their Various Topological Environments in the Benzenoid Hydrocarbons. Crystal and Molecular Structure of Coronene. *J. Chem. Inf. Comput. Sci.* **1996**, *36*, 1135-1141.
2. a) M. Baranac-Stojanović, Aromaticity and Stability of Azaborines. *Chem. Eur. J.* **2014**, *20*, 16558-16565; b) R. Carion, V. Liégeois, B. Champagne, D. Bonifazi, S. Pelloni, P. Lazzeretti, On the Aromatic Character of 1,2-Dihydro-1,2-azaborine According to Magnetic Criteria. *J. Phys. Chem. Lett.* **2010**, *1*, 1563-1568; c) R. A. Iwaki, T. Udagawa, Effect of heteroatoms on aromaticity analyzed by geometric, magnetic, and electronic criteria. *Chem. Phys. Lett.* **2020**, *745*, 137271; d) M. d. R. Merino-García, L. A. Soriano-Agueda, J. d. D. Guzmán-Hernández, D. Martínez-Otero, B. L. Rivera, F. Cortés-Guzmán, J. E. Barquera-Lozada, V. Jancik, Benzene and Borazine, so Different, yet so Similar: Insight from Experimental Charge Density Analysis. *Inorg. Chem.* **2022**, *61*, 6785-6797.

**Absolute energies (a.u.) and x, y, z coordinates of structures optimized using  
the  $\omega$ B97XD functional and 6-311+G(d,p) basis set**

**Coronene ( $C_{2h}$ )**

E = -921.76968 a.u.

| Center<br>Number | Atomic<br>Number | Atomic<br>Type | Coordinates (Angstroms) |           |          |
|------------------|------------------|----------------|-------------------------|-----------|----------|
|                  |                  |                | X                       | Y         | Z        |
| 1                | 6                | 0              | 1.244956                | 3.519733  | 0.000000 |
| 2                | 6                | 0              | 0.000000                | 2.832539  | 0.000000 |
| 3                | 6                | 0              | 0.000000                | 1.424527  | 0.000000 |
| 4                | 6                | 0              | 1.233586                | 0.712309  | 0.000000 |
| 5                | 6                | 0              | 2.452856                | 1.416347  | 0.000000 |
| 6                | 6                | 0              | 2.425403                | 2.838322  | 0.000000 |
| 7                | 6                | 0              | -1.233586               | 0.712309  | 0.000000 |
| 8                | 6                | 0              | 1.233586                | -0.712309 | 0.000000 |
| 9                | 6                | 0              | 0.000000                | -1.424527 | 0.000000 |
| 10               | 6                | 0              | -1.233586               | -0.712309 | 0.000000 |
| 11               | 6                | 0              | 0.000000                | -2.832539 | 0.000000 |
| 12               | 6                | 0              | 1.244956                | -3.519733 | 0.000000 |
| 13               | 6                | 0              | 2.425403                | -2.838322 | 0.000000 |
| 14               | 6                | 0              | 2.452856                | -1.416347 | 0.000000 |
| 15               | 6                | 0              | 3.670414                | -0.681546 | 0.000000 |
| 16               | 6                | 0              | 3.670414                | 0.681546  | 0.000000 |
| 17               | 1                | 0              | 4.608511                | 1.227054  | 0.000000 |
| 18               | 1                | 0              | 4.608511                | -1.227055 | 0.000000 |
| 19               | 1                | 0              | 1.241017                | 4.604949  | 0.000000 |
| 20               | 1                | 0              | 3.367243                | 3.377333  | 0.000000 |
| 21               | 1                | 0              | 1.241017                | -4.604949 | 0.000000 |
| 22               | 1                | 0              | 3.367243                | -3.377333 | 0.000000 |
| 23               | 6                | 0              | -1.244956               | 3.519733  | 0.000000 |
| 24               | 6                | 0              | -2.425403               | 2.838322  | 0.000000 |
| 25               | 6                | 0              | -2.452856               | 1.416347  | 0.000000 |
| 26               | 1                | 0              | -1.241017               | 4.604949  | 0.000000 |
| 27               | 1                | 0              | -3.367243               | 3.377333  | 0.000000 |
| 28               | 6                | 0              | -3.670414               | 0.681546  | 0.000000 |
| 29               | 6                | 0              | -3.670414               | -0.681546 | 0.000000 |
| 30               | 6                | 0              | -2.452856               | -1.416347 | 0.000000 |
| 31               | 1                | 0              | -4.608511               | 1.227055  | 0.000000 |
| 32               | 1                | 0              | -4.608511               | -1.227054 | 0.000000 |
| 33               | 6                | 0              | -1.244956               | -3.519733 | 0.000000 |
| 34               | 1                | 0              | -1.241017               | -4.604949 | 0.000000 |
| 35               | 6                | 0              | -2.425403               | -2.838322 | 0.000000 |
| 36               | 1                | 0              | -3.367243               | -3.377333 | 0.000000 |

**Coronene ( $C_3$ )**

E = -921.7696793 a.u.

| Center<br>Number | Atomic<br>Number | Atomic<br>Type | Coordinates (Angstroms) |           |           |
|------------------|------------------|----------------|-------------------------|-----------|-----------|
|                  |                  |                | X                       | Y         | Z         |
| 1                | 6                | 0              | -2.838257               | -2.425456 | 0.000122  |
| 2                | 6                | 0              | -1.416275               | -2.452753 | 0.000043  |
| 3                | 6                | 0              | -0.712277               | -1.233543 | -0.002241 |
| 4                | 6                | 0              | -1.424558               | -0.000028 | 0.002069  |

|    |   |   |           |           |           |
|----|---|---|-----------|-----------|-----------|
| 5  | 6 | 0 | -2.832507 | 0.000000  | 0.000024  |
| 6  | 6 | 0 | -3.519934 | -1.245066 | 0.000286  |
| 7  | 6 | 0 | 0.712304  | -1.233690 | 0.002069  |
| 8  | 6 | 0 | -0.712141 | 1.233622  | -0.002241 |
| 9  | 6 | 0 | 0.712255  | 1.233718  | 0.002069  |
| 10 | 6 | 0 | 1.424418  | -0.000079 | -0.002241 |
| 11 | 6 | 0 | 1.416254  | 2.453023  | 0.000024  |
| 12 | 6 | 0 | 0.681709  | 3.670885  | 0.000286  |
| 13 | 6 | 0 | -0.681378 | 3.670731  | 0.000122  |
| 14 | 6 | 0 | -1.416009 | 2.452907  | 0.000043  |
| 15 | 6 | 0 | -2.838189 | 2.425417  | -0.000382 |
| 16 | 6 | 0 | -3.519900 | 1.245069  | 0.000006  |
| 17 | 1 | 0 | -4.605003 | 1.240964  | -0.000141 |
| 18 | 1 | 0 | -3.377312 | 3.367163  | -0.000074 |
| 19 | 1 | 0 | -3.377343 | -3.367262 | 0.000485  |
| 20 | 1 | 0 | -4.605036 | -1.241111 | 0.000167  |
| 21 | 1 | 0 | 1.227684  | 4.608634  | 0.000167  |
| 22 | 1 | 0 | -1.227462 | 4.608496  | 0.000485  |
| 23 | 6 | 0 | -0.681378 | -3.670652 | -0.000382 |
| 24 | 6 | 0 | 0.681688  | -3.670858 | 0.000006  |
| 25 | 6 | 0 | 1.416253  | -2.453023 | 0.000024  |
| 26 | 1 | 0 | -1.227393 | -4.608419 | -0.000074 |
| 27 | 1 | 0 | 1.227796  | -4.608532 | -0.000141 |
| 28 | 6 | 0 | 2.838225  | -2.425819 | 0.000286  |
| 29 | 6 | 0 | 3.519635  | -1.245274 | 0.000122  |
| 30 | 6 | 0 | 2.832284  | -0.000154 | 0.000043  |
| 31 | 1 | 0 | 3.377352  | -3.367523 | 0.000167  |
| 32 | 1 | 0 | 4.604806  | -1.241234 | 0.000485  |
| 33 | 6 | 0 | 2.838212  | 2.425788  | 0.000006  |
| 34 | 1 | 0 | 3.377208  | 3.367568  | -0.000141 |
| 35 | 6 | 0 | 3.519567  | 1.245235  | -0.000382 |
| 36 | 1 | 0 | 4.604705  | 1.241256  | -0.000074 |

**Cor-3BN**

E = -932.1098344 a.u.

| Center<br>Number | Atomic<br>Number | Atomic<br>Type | Coordinates (Angstroms) |           |          |
|------------------|------------------|----------------|-------------------------|-----------|----------|
|                  |                  |                | X                       | Y         | Z        |
| 1                | 6                | 0              | 2.425140                | 2.841061  | 0.000000 |
| 2                | 6                | 0              | 2.459738                | 1.438859  | 0.000000 |
| 3                | 6                | 0              | 1.236702                | 0.734051  | 0.000000 |
| 4                | 6                | 0              | 0.000000                | 1.426429  | 0.000000 |
| 5                | 6                | 0              | 0.018489                | 2.835483  | 0.000000 |
| 6                | 6                | 0              | 1.235553                | 3.530668  | 0.000000 |
| 7                | 6                | 0              | 1.235324                | -0.713215 | 0.000000 |
| 8                | 6                | 0              | -1.254058               | 0.703990  | 0.000000 |
| 9                | 6                | 0              | -1.235324               | -0.713215 | 0.000000 |
| 10               | 6                | 0              | 0.017356                | -1.438041 | 0.000000 |
| 11               | 6                | 0              | -2.464845               | -1.401730 | 0.000000 |
| 12               | 6                | 0              | -3.675424               | -0.695314 | 0.000000 |
| 13               | 6                | 0              | -3.673001               | 0.679702  | 0.000000 |
| 14               | 6                | 0              | -2.475958               | 1.410766  | 0.000000 |
| 15               | 1                | 0              | -1.072525               | 4.543224  | 0.000000 |
| 16               | 1                | 0              | -3.422860               | 3.634387  | 0.000000 |
| 17               | 1                | 0              | 3.361711                | 3.389931  | 0.000000 |
| 18               | 1                | 0              | 1.223727                | 4.616488  | 0.000000 |
| 19               | 1                | 0              | -4.609859               | -1.248465 | 0.000000 |



|    |   |   |           |           |          |
|----|---|---|-----------|-----------|----------|
| 20 | 1 | 0 | -4.616622 | 1.216362  | 0.000000 |
| 21 | 6 | 0 | 2.446356  | -1.433754 | 0.000000 |
| 22 | 1 | 0 | 4.858902  | 1.147090  | 0.000000 |
| 23 | 1 | 0 | 4.470810  | -1.342778 | 0.000000 |
| 24 | 6 | 0 | 2.439872  | -2.835354 | 0.000000 |
| 25 | 6 | 0 | 1.247861  | -3.520763 | 0.000000 |
| 26 | 6 | 0 | 0.016220  | -2.849625 | 0.000000 |
| 27 | 1 | 0 | 3.386132  | -3.368023 | 0.000000 |
| 28 | 1 | 0 | 1.254911  | -4.606293 | 0.000000 |
| 29 | 1 | 0 | -3.398285 | -3.200446 | 0.000000 |
| 30 | 1 | 0 | -1.436041 | -4.781477 | 0.000000 |
| 31 | 7 | 0 | -1.173557 | 3.539559  | 0.000000 |
| 32 | 7 | 0 | -2.478570 | -2.786109 | 0.000000 |
| 33 | 7 | 0 | 3.652126  | -0.753450 | 0.000000 |
| 34 | 5 | 0 | -2.451967 | 2.938546  | 0.000000 |
| 35 | 5 | 0 | -1.318872 | -3.592739 | 0.000000 |
| 36 | 5 | 0 | 3.770839  | 0.654193  | 0.000000 |

**Cor-4BN**

E = -935.561233 a.u.

| Center<br>Number | Atomic<br>Number | Atomic<br>Type | Coordinates (Angstroms) |           |          |
|------------------|------------------|----------------|-------------------------|-----------|----------|
|                  |                  |                | X                       | Y         | Z        |
| 1                | 6                | 0              | 3.666941                | -0.675068 | 0.000000 |
| 2                | 6                | 0              | 2.476323                | -1.404930 | 0.000000 |
| 3                | 6                | 0              | 1.247177                | -0.702168 | 0.000000 |
| 4                | 6                | 0              | 1.226990                | 0.712601  | 0.000000 |
| 5                | 6                | 0              | 2.458609                | 1.398601  | 0.000000 |
| 6                | 6                | 0              | 3.667812                | 0.705220  | 0.000000 |
| 7                | 6                | 0              | 0.000000                | -1.418484 | 0.000000 |
| 8                | 6                | 0              | -0.027662               | 1.431260  | 0.000000 |
| 9                | 6                | 0              | -1.233975               | 0.732917  | 0.000000 |
| 10               | 6                | 0              | -1.229687               | -0.716815 | 0.000000 |
| 11               | 6                | 0              | -2.481108               | 1.468262  | 0.000000 |
| 12               | 6                | 0              | -2.511053               | 2.841650  | 0.000000 |
| 13               | 1                | 0              | 3.343481                | 3.236070  | 0.000000 |
| 14               | 1                | 0              | 1.291350                | 4.717555  | 0.000000 |
| 15               | 1                | 0              | 4.612036                | -1.208647 | 0.000000 |
| 16               | 1                | 0              | 4.599908                | 1.260884  | 0.000000 |
| 17               | 1                | 0              | -3.484255               | 3.325724  | 0.000000 |
| 18               | 1                | 0              | -1.123986               | 4.785681  | 0.000000 |
| 19               | 6                | 0              | -0.016539               | -2.833529 | 0.000000 |
| 20               | 1                | 0              | 3.427318                | -3.626842 | 0.000000 |
| 21               | 1                | 0              | 1.079055                | -4.537963 | 0.000000 |
| 22               | 6                | 0              | -1.226142               | -3.527761 | 0.000000 |
| 23               | 6                | 0              | -2.415671               | -2.828845 | 0.000000 |
| 24               | 6                | 0              | -2.449079               | -1.432683 | 0.000000 |
| 25               | 1                | 0              | -1.219172               | -4.613145 | 0.000000 |
| 26               | 1                | 0              | -3.354257               | -3.374048 | 0.000000 |
| 27               | 1                | 0              | -4.492444               | 1.323928  | 0.000000 |
| 28               | 1                | 0              | -4.848789               | -1.166774 | 0.000000 |
| 29               | 7                | 0              | 2.443930                | 2.782506  | 0.000000 |
| 30               | 7                | 0              | -3.666187               | 0.745316  | 0.000000 |
| 31               | 7                | 0              | 1.179282                | -3.534264 | 0.000000 |
| 32               | 5                | 0              | 1.255237                | 3.532322  | 0.000000 |
| 33               | 5                | 0              | -3.767434               | -0.659699 | 0.000000 |
| 34               | 5                | 0              | 2.455444                | -2.933285 | 0.000000 |

|    |   |   |           |          |          |
|----|---|---|-----------|----------|----------|
| 35 | 5 | 0 | -1.230860 | 3.598339 | 0.000000 |
| 36 | 7 | 0 | -0.001282 | 2.818986 | 0.000000 |

**Cor-5BN**

E = -939.0839759 a.u.

| Center Number | Atomic Number | Atomic Type | Coordinates (Angstroms) |           |          |
|---------------|---------------|-------------|-------------------------|-----------|----------|
|               |               |             | X                       | Y         | Z        |
| 1             | 6             | 0           | -3.666194               | -0.738680 | 0.000000 |
| 2             | 6             | 0           | -2.469923               | -1.455929 | 0.000000 |
| 3             | 6             | 0           | -1.247766               | -0.736642 | 0.000000 |
| 4             | 6             | 0           | -1.251001               | 0.679508  | 0.000000 |
| 5             | 6             | 0           | -2.488852               | 1.353804  | 0.000000 |
| 6             | 6             | 0           | -3.687038               | 0.645121  | 0.000000 |
| 7             | 6             | 0           | 0.006982                | -1.438407 | 0.000000 |
| 8             | 6             | 0           | 0.000000                | 1.401078  | 0.000000 |
| 9             | 6             | 0           | 1.200909                | 0.726359  | 0.000000 |
| 10            | 6             | 0           | 1.222001                | -0.714953 | 0.000000 |
| 11            | 1             | 0           | -3.384787               | 3.187955  | 0.000000 |
| 12            | 1             | 0           | -1.347891               | 4.689458  | 0.000000 |
| 13            | 1             | 0           | -4.605830               | -1.282369 | 0.000000 |
| 14            | 1             | 0           | -4.627915               | 1.185932  | 0.000000 |
| 15            | 1             | 0           | 3.264464                | 3.511211  | 0.000000 |
| 16            | 1             | 0           | 1.093384                | 4.784315  | 0.000000 |
| 17            | 6             | 0           | 0.047714                | -2.853633 | 0.000000 |
| 18            | 1             | 0           | -3.386590               | -3.693457 | 0.000000 |
| 19            | 1             | 0           | -1.027441               | -4.573250 | 0.000000 |
| 20            | 6             | 0           | 1.271475                | -3.518300 | 0.000000 |
| 21            | 6             | 0           | 2.451323                | -2.792245 | 0.000000 |
| 22            | 6             | 0           | 2.466024                | -1.397079 | 0.000000 |
| 23            | 1             | 0           | 1.290710                | -4.603724 | 0.000000 |
| 24            | 1             | 0           | 3.397230                | -3.325675 | 0.000000 |
| 25            | 1             | 0           | 4.640482                | 1.304225  | 0.000000 |
| 26            | 1             | 0           | 4.856547                | -1.192508 | 0.000000 |
| 27            | 7             | 0           | -2.482309               | 2.740955  | 0.000000 |
| 28            | 7             | 0           | 3.767895                | 0.797280  | 0.000000 |
| 29            | 7             | 0           | -1.140300               | -3.570900 | 0.000000 |
| 30            | 5             | 0           | -1.297068               | 3.502954  | 0.000000 |
| 31            | 5             | 0           | 3.802036                | -0.621858 | 0.000000 |
| 32            | 5             | 0           | -2.424493               | -2.985447 | 0.000000 |
| 33            | 5             | 0           | 1.181243                | 3.596415  | 0.000000 |
| 34            | 7             | 0           | -0.036858               | 2.808581  | 0.000000 |
| 35            | 7             | 0           | 2.430977                | 2.943100  | 0.000000 |
| 36            | 5             | 0           | 2.523858                | 1.510888  | 0.000000 |

**Cor-6BN**

E = -942.5428374 a.u.

| Center Number | Atomic Number | Atomic Type | Coordinates (Angstroms) |           |          |
|---------------|---------------|-------------|-------------------------|-----------|----------|
|               |               |             | X                       | Y         | Z        |
| 1             | 6             | 0           | -3.651592               | -0.725227 | 0.000000 |
| 2             | 6             | 0           | -2.463674               | -1.442289 | 0.000000 |

|    |   |   |           |           |          |
|----|---|---|-----------|-----------|----------|
| 3  | 6 | 0 | -1.226904 | -0.735892 | 0.000000 |
| 4  | 6 | 0 | -1.237987 | 0.682051  | 0.000000 |
| 5  | 6 | 0 | -2.481610 | 1.363612  | 0.000000 |
| 6  | 6 | 0 | -3.676586 | 0.664416  | 0.000000 |
| 7  | 6 | 0 | 0.018275  | -1.446529 | 0.000000 |
| 8  | 6 | 0 | 0.000000  | 1.395250  | 0.000000 |
| 9  | 6 | 0 | 1.204589  | 0.710552  | 0.000000 |
| 10 | 6 | 0 | 1.218298  | -0.720237 | 0.000000 |
| 11 | 1 | 0 | -3.364654 | 3.201851  | 0.000000 |
| 12 | 1 | 0 | -1.319489 | 4.692464  | 0.000000 |
| 13 | 1 | 0 | -4.591117 | -1.269224 | 0.000000 |
| 14 | 1 | 0 | -4.617759 | 1.204040  | 0.000000 |
| 15 | 1 | 0 | 3.283402  | 3.488550  | 0.000000 |
| 16 | 1 | 0 | 1.116235  | 4.774339  | 0.000000 |
| 17 | 6 | 0 | 0.045776  | -2.896761 | 0.000000 |
| 18 | 1 | 0 | -3.416117 | -3.660821 | 0.000000 |
| 19 | 1 | 0 | -1.070666 | -4.577609 | 0.000000 |
| 20 | 6 | 0 | 1.227736  | -3.587945 | 0.000000 |
| 21 | 1 | 0 | 1.182299  | -4.674016 | 0.000000 |
| 22 | 1 | 0 | 3.594792  | -3.332856 | 0.000000 |
| 23 | 1 | 0 | 4.636137  | 1.215067  | 0.000000 |
| 24 | 1 | 0 | 4.725445  | -1.282443 | 0.000000 |
| 25 | 7 | 0 | -2.464384 | 2.750146  | 0.000000 |
| 26 | 7 | 0 | 3.739211  | 0.754823  | 0.000000 |
| 27 | 7 | 0 | -1.168470 | -3.573617 | 0.000000 |
| 28 | 5 | 0 | -1.277230 | 3.505887  | 0.000000 |
| 29 | 5 | 0 | 3.713062  | -0.658489 | 0.000000 |
| 30 | 5 | 0 | -2.440830 | -2.970874 | 0.000000 |
| 31 | 5 | 0 | 1.198183  | 3.586622  | 0.000000 |
| 32 | 7 | 0 | -0.021049 | 2.802921  | 0.000000 |
| 33 | 7 | 0 | 2.445304  | 2.927829  | 0.000000 |
| 34 | 5 | 0 | 2.520974  | 1.498228  | 0.000000 |
| 35 | 5 | 0 | 2.513586  | -2.829968 | 0.000000 |
| 36 | 7 | 0 | 2.447223  | -1.376727 | 0.000000 |

**Cor-7BN**

E = -946.0678844 a.u.

| Center<br>Number | Atomic<br>Number | Atomic<br>Type | Coordinates (Angstroms) |           |          |
|------------------|------------------|----------------|-------------------------|-----------|----------|
|                  |                  |                | X                       | Y         | Z        |
| 1                | 6                | 0              | -2.457664               | -2.791150 | 0.000000 |
| 2                | 6                | 0              | -2.482422               | -1.405053 | 0.000000 |
| 3                | 6                | 0              | -1.235177               | -0.705622 | 0.000000 |
| 4                | 6                | 0              | -0.018451               | -1.433053 | 0.000000 |
| 5                | 6                | 0              | -0.058880               | -2.852098 | 0.000000 |
| 6                | 6                | 0              | -1.268284               | -3.521587 | 0.000000 |
| 7                | 6                | 0              | -1.219853               | 0.719031  | 0.000000 |
| 8                | 6                | 0              | 1.216576                | -0.719860 | 0.000000 |
| 9                | 6                | 0              | 1.233859                | 0.670112  | 0.000000 |
| 10               | 6                | 0              | 0.000000                | 1.384181  | 0.000000 |
| 11               | 1                | 0              | 1.091613                | -4.537963 | 0.000000 |
| 12               | 1                | 0              | 3.406411                | -3.514333 | 0.000000 |
| 13               | 1                | 0              | -3.400443               | -3.330588 | 0.000000 |
| 14               | 1                | 0              | -1.284758               | -4.606581 | 0.000000 |
| 15               | 1                | 0              | 4.676343                | 1.076843  | 0.000000 |
| 16               | 1                | 0              | 4.700747                | -1.439883 | 0.000000 |
| 17               | 1                | 0              | -4.873445               | -1.208453 | 0.000000 |

|    |   |   |           |           |          |
|----|---|---|-----------|-----------|----------|
| 18 | 1 | 0 | -4.659392 | 1.291272  | 0.000000 |
| 19 | 1 | 0 | -3.271551 | 3.506716  | 0.000000 |
| 20 | 1 | 0 | -1.108991 | 4.765200  | 0.000000 |
| 21 | 1 | 0 | 3.371385  | 3.397227  | 0.000000 |
| 22 | 1 | 0 | 1.250730  | 4.721300  | 0.000000 |
| 23 | 7 | 0 | 1.150939  | -3.532412 | 0.000000 |
| 24 | 7 | 0 | 2.526526  | 2.847431  | 0.000000 |
| 25 | 7 | 0 | -3.786755 | 0.784270  | 0.000000 |
| 26 | 5 | 0 | 2.400419  | -2.882770 | 0.000000 |
| 27 | 5 | 0 | 1.285309  | 3.530839  | 0.000000 |
| 28 | 5 | 0 | -3.820683 | -0.634230 | 0.000000 |
| 29 | 5 | 0 | 3.712304  | -0.775408 | 0.000000 |
| 30 | 7 | 0 | 2.425356  | -1.442471 | 0.000000 |
| 31 | 7 | 0 | 3.769477  | 0.635821  | 0.000000 |
| 32 | 5 | 0 | 2.570006  | 1.418985  | 0.000000 |
| 33 | 5 | 0 | -1.186316 | 3.576374  | 0.000000 |
| 34 | 7 | 0 | 0.036720  | 2.796103  | 0.000000 |
| 35 | 7 | 0 | -2.443773 | 2.930773  | 0.000000 |
| 36 | 5 | 0 | -2.542298 | 1.500857  | 0.000000 |

**Cor-8BN**

E = -949.5332997 a.u.

| Center<br>Number | Atomic<br>Number | Atomic<br>Type | Coordinates (Angstroms) |           |          |
|------------------|------------------|----------------|-------------------------|-----------|----------|
|                  |                  |                | X                       | Y         | Z        |
| 1                | 6                | 0              | 1.236036                | -0.710793 | 0.000000 |
| 2                | 6                | 0              | 0.025350                | -1.443648 | 0.000000 |
| 3                | 6                | 0              | 0.052641                | -2.893729 | 0.000000 |
| 4                | 6                | 0              | 1.222488                | -3.594571 | 0.000000 |
| 5                | 6                | 0              | 1.225695                | 0.701684  | 0.000000 |
| 6                | 6                | 0              | -1.196011               | -0.726030 | 0.000000 |
| 7                | 6                | 0              | -1.220953               | 0.674159  | 0.000000 |
| 8                | 6                | 0              | 0.000000                | 1.377978  | 0.000000 |
| 9                | 1                | 0              | -1.136789               | -4.536894 | 0.000000 |
| 10               | 1                | 0              | -3.433391               | -3.482408 | 0.000000 |
| 11               | 1                | 0              | 3.590839                | -3.347938 | 0.000000 |
| 12               | 1                | 0              | 1.169332                | -4.680016 | 0.000000 |
| 13               | 1                | 0              | -4.664211               | 1.101836  | 0.000000 |
| 14               | 1                | 0              | -4.692285               | -1.414282 | 0.000000 |
| 15               | 1                | 0              | 4.738280                | -1.302462 | 0.000000 |
| 16               | 1                | 0              | 4.655739                | 1.198835  | 0.000000 |
| 17               | 1                | 0              | 3.293018                | 3.482834  | 0.000000 |
| 18               | 1                | 0              | 1.134007                | 4.754709  | 0.000000 |
| 19               | 1                | 0              | -3.347468               | 3.409728  | 0.000000 |
| 20               | 1                | 0              | -1.218837               | 4.725412  | 0.000000 |
| 21               | 7                | 0              | -1.180121               | -3.530124 | 0.000000 |
| 22               | 7                | 0              | -2.503971               | 2.857723  | 0.000000 |
| 23               | 7                | 0              | 3.758082                | 0.739812  | 0.000000 |
| 24               | 5                | 0              | -2.418507               | -2.865367 | 0.000000 |
| 25               | 5                | 0              | -1.261939               | 3.535571  | 0.000000 |
| 26               | 5                | 0              | 3.728896                | -0.673017 | 0.000000 |
| 27               | 5                | 0              | -3.701775               | -0.753206 | 0.000000 |
| 28               | 7                | 0              | -2.419532               | -1.427163 | 0.000000 |
| 29               | 7                | 0              | -3.759077               | 0.657860  | 0.000000 |
| 30               | 5                | 0              | -2.554894               | 1.429727  | 0.000000 |
| 31               | 5                | 0              | 1.205714                | 3.566182  | 0.000000 |
| 32               | 7                | 0              | -0.019094               | 2.790436  | 0.000000 |

|    |   |   |          |           |          |
|----|---|---|----------|-----------|----------|
| 33 | 7 | 0 | 2.460180 | 2.914805  | 0.000000 |
| 34 | 5 | 0 | 2.541053 | 1.487261  | 0.000000 |
| 35 | 5 | 0 | 2.513811 | -2.837064 | 0.000000 |
| 36 | 7 | 0 | 2.460461 | -1.384791 | 0.000000 |

### Cor-9BN

E = -953.0614075 a.u.

| Center<br>Number | Atomic<br>Number | Atomic<br>Type | Coordinates (Angstroms) |           |          |
|------------------|------------------|----------------|-------------------------|-----------|----------|
|                  |                  |                | X                       | Y         | Z        |
| 1                | 6                | 0              | -0.697635               | 1.208258  | 0.000000 |
| 2                | 6                | 0              | -1.416119               | 0.000000  | 0.000000 |
| 3                | 6                | 0              | 0.708060                | 1.226395  | 0.000000 |
| 4                | 6                | 0              | -0.697565               | -1.208299 | 0.000000 |
| 5                | 6                | 0              | 0.708060                | -1.226395 | 0.000000 |
| 6                | 6                | 0              | 1.395200                | 0.000041  | 0.000000 |
| 7                | 1                | 0              | -4.609861               | -1.337986 | 0.000000 |
| 8                | 1                | 0              | -3.401157               | -3.528430 | 0.000000 |
| 9                | 1                | 0              | -3.401157               | 3.528430  | 0.000000 |
| 10               | 1                | 0              | -4.609861               | 1.337986  | 0.000000 |
| 11               | 1                | 0              | 1.146201                | -4.661250 | 0.000000 |
| 12               | 1                | 0              | -1.355132               | -4.709703 | 0.000000 |
| 13               | 1                | 0              | -1.355131               | 4.709703  | 0.000000 |
| 14               | 1                | 0              | 1.146201                | 4.661250  | 0.000000 |
| 15               | 1                | 0              | 3.463660                | 3.323264  | 0.000000 |
| 16               | 1                | 0              | 4.756289                | 1.181273  | 0.000000 |
| 17               | 1                | 0              | 3.463660                | -3.323264 | 0.000000 |
| 18               | 1                | 0              | 4.756289                | -1.181273 | 0.000000 |
| 19               | 5                | 0              | -2.946180               | 0.000000  | 0.000000 |
| 20               | 5                | 0              | -2.853674               | -2.470509 | 0.000000 |
| 21               | 5                | 0              | -0.712725               | -3.706367 | 0.000000 |
| 22               | 5                | 0              | -2.853445               | 2.470421  | 0.000000 |
| 23               | 5                | 0              | -0.712687               | 3.706609  | 0.000000 |
| 24               | 5                | 0              | 1.473090                | 2.551467  | 0.000000 |
| 25               | 5                | 0              | 3.566170                | 1.235946  | 0.000000 |
| 26               | 5                | 0              | 3.566361                | -1.236100 | 0.000000 |
| 27               | 5                | 0              | 1.473090                | -2.551467 | 0.000000 |
| 28               | 7                | 0              | -1.404647               | -2.432743 | 0.000000 |
| 29               | 7                | 0              | -3.604041               | -1.270045 | 0.000000 |
| 30               | 7                | 0              | -3.604041               | 1.270045  | 0.000000 |
| 31               | 7                | 0              | -1.404494               | 2.432832  | 0.000000 |
| 32               | 7                | 0              | 0.702129                | 3.756214  | 0.000000 |
| 33               | 7                | 0              | 2.901912                | 2.486169  | 0.000000 |
| 34               | 7                | 0              | 2.809141                | -0.000089 | 0.000000 |
| 35               | 7                | 0              | 2.901912                | -2.486169 | 0.000000 |
| 36               | 7                | 0              | 0.702129                | -3.756214 | 0.000000 |

### Benzene

E = -232.2209145 a.u.

| Center<br>Number | Atomic<br>Number | Atomic<br>Type | Coordinates (Angstroms) |          |          |
|------------------|------------------|----------------|-------------------------|----------|----------|
|                  |                  |                | X                       | Y        | Z        |
| 1                | 6                | 0              | 0.000000                | 1.390845 | 0.000000 |
| 2                | 6                | 0              | 1.204507                | 0.695423 | 0.000000 |

|    |   |   |           |           |          |
|----|---|---|-----------|-----------|----------|
| 3  | 6 | 0 | 1.204507  | -0.695423 | 0.000000 |
| 4  | 6 | 0 | 0.000000  | -1.390845 | 0.000000 |
| 5  | 6 | 0 | -1.204507 | -0.695423 | 0.000000 |
| 6  | 6 | 0 | -1.204507 | 0.695423  | 0.000000 |
| 7  | 1 | 0 | 0.000000  | 2.475315  | 0.000000 |
| 8  | 1 | 0 | 2.143686  | 1.237658  | 0.000000 |
| 9  | 1 | 0 | 2.143686  | -1.237658 | 0.000000 |
| 10 | 1 | 0 | 0.000000  | -2.475315 | 0.000000 |
| 11 | 1 | 0 | -2.143686 | -1.237658 | 0.000000 |
| 12 | 1 | 0 | -2.143686 | 1.237658  | 0.000000 |

## Naphthalene

E = -385.8430462 a.u.

| Center Number | Atomic Number | Atomic Type | Coordinates (Angstroms) |           |           |
|---------------|---------------|-------------|-------------------------|-----------|-----------|
|               |               |             | X                       | Y         | Z         |
| 1             | 6             | 0           | 0.000000                | -2.423063 | -0.706912 |
| 2             | 6             | 0           | 0.000000                | -1.241437 | -1.396633 |
| 3             | 6             | 0           | 0.000000                | 0.000000  | -0.710665 |
| 4             | 6             | 0           | 0.000000                | 0.000000  | 0.710665  |
| 5             | 6             | 0           | 0.000000                | -1.241437 | 1.396633  |
| 6             | 6             | 0           | 0.000000                | -2.423063 | 0.706912  |
| 7             | 1             | 0           | 0.000000                | 1.239064  | -2.482169 |
| 8             | 1             | 0           | 0.000000                | -3.365755 | -1.242693 |
| 9             | 1             | 0           | 0.000000                | -1.239064 | -2.482169 |
| 10            | 6             | 0           | 0.000000                | 1.241437  | -1.396633 |
| 11            | 6             | 0           | 0.000000                | 1.241437  | 1.396633  |
| 12            | 1             | 0           | 0.000000                | -1.239064 | 2.482169  |
| 13            | 1             | 0           | 0.000000                | -3.365755 | 1.242693  |
| 14            | 6             | 0           | 0.000000                | 2.423063  | 0.706912  |
| 15            | 6             | 0           | 0.000000                | 2.423063  | -0.706912 |
| 16            | 1             | 0           | 0.000000                | 1.239064  | 2.482169  |
| 17            | 1             | 0           | 0.000000                | 3.365755  | 1.242693  |
| 18            | 1             | 0           | 0.000000                | 3.365755  | -1.242693 |

## Phenanthrene

E = -539.4689893 a.u.

| Center Number | Atomic Number | Atomic Type | Coordinates (Angstroms) |           |           |
|---------------|---------------|-------------|-------------------------|-----------|-----------|
|               |               |             | X                       | Y         | Z         |
| 1             | 6             | 0           | 0.000000                | -3.545961 | -0.295539 |
| 2             | 6             | 0           | 0.000000                | -2.826019 | 0.874098  |
| 3             | 6             | 0           | 0.000000                | -1.416170 | 0.859089  |
| 4             | 6             | 0           | 0.000000                | -0.728336 | -0.376070 |
| 5             | 6             | 0           | 0.000000                | -1.493770 | -1.560578 |
| 6             | 6             | 0           | 0.000000                | -2.869044 | -1.524086 |
| 7             | 6             | 0           | 0.000000                | -0.674779 | 2.088468  |
| 8             | 6             | 0           | 0.000000                | 0.728336  | -0.376070 |
| 9             | 6             | 0           | 0.000000                | 1.416170  | 0.859089  |
| 10            | 6             | 0           | 0.000000                | 0.674779  | 2.088468  |
| 11            | 6             | 0           | 0.000000                | 2.826019  | 0.874098  |
| 12            | 1             | 0           | 0.000000                | 3.335900  | 1.832231  |
| 13            | 6             | 0           | 0.000000                | 3.545961  | -0.295539 |
| 14            | 6             | 0           | 0.000000                | 2.869044  | -1.524086 |

|    |   |   |          |           |           |
|----|---|---|----------|-----------|-----------|
| 15 | 6 | 0 | 0.000000 | 1.493770  | -1.560578 |
| 16 | 1 | 0 | 0.000000 | -1.226363 | 3.023041  |
| 17 | 1 | 0 | 0.000000 | -4.629771 | -0.271635 |
| 18 | 1 | 0 | 0.000000 | -3.335900 | 1.832231  |
| 19 | 1 | 0 | 0.000000 | -1.001292 | -2.524694 |
| 20 | 1 | 0 | 0.000000 | -3.431115 | -2.451235 |
| 21 | 1 | 0 | 0.000000 | 1.226363  | 3.023041  |
| 22 | 1 | 0 | 0.000000 | 4.629771  | -0.271635 |
| 23 | 1 | 0 | 0.000000 | 3.431115  | -2.451235 |
| 24 | 1 | 0 | 0.000000 | 1.001292  | -2.524694 |

## Triphenylene

E = -693.0932701 a.u.

| Center<br>Number | Atomic<br>Number | Atomic<br>Type | Coordinates (Angstroms) |           |          |
|------------------|------------------|----------------|-------------------------|-----------|----------|
|                  |                  |                | X                       | Y         | Z        |
| 1                | 6                | 0              | -0.697695               | 3.687138  | 0.000000 |
| 2                | 6                | 0              | -1.377692               | 2.489934  | 0.000000 |
| 3                | 6                | 0              | -0.704391               | 1.254001  | 0.000000 |
| 4                | 6                | 0              | 0.704391                | 1.254001  | 0.000000 |
| 5                | 6                | 0              | 1.377692                | 2.489934  | 0.000000 |
| 6                | 6                | 0              | 0.697695                | 3.687138  | 0.000000 |
| 7                | 6                | 0              | -1.438192               | -0.016980 | 0.000000 |
| 8                | 6                | 0              | 1.438192                | -0.016980 | 0.000000 |
| 9                | 6                | 0              | 0.733801                | -1.237021 | 0.000000 |
| 10               | 6                | 0              | -0.733801               | -1.237021 | 0.000000 |
| 11               | 6                | 0              | 1.467500                | -2.438083 | 0.000000 |
| 12               | 6                | 0              | 2.844308                | -2.447791 | 0.000000 |
| 13               | 6                | 0              | 3.542003                | -1.239348 | 0.000000 |
| 14               | 6                | 0              | 2.845192                | -0.051851 | 0.000000 |
| 15               | 1                | 0              | -1.247156               | 4.621556  | 0.000000 |
| 16               | 1                | 0              | 1.247156                | 4.621556  | 0.000000 |
| 17               | 1                | 0              | 3.378807                | -3.390846 | 0.000000 |
| 18               | 1                | 0              | 4.625963                | -1.230709 | 0.000000 |
| 19               | 6                | 0              | -2.845192               | -0.051851 | 0.000000 |
| 20               | 6                | 0              | -3.542003               | -1.239348 | 0.000000 |
| 21               | 6                | 0              | -2.844308               | -2.447791 | 0.000000 |
| 22               | 6                | 0              | -1.467500               | -2.438083 | 0.000000 |
| 23               | 1                | 0              | -4.625963               | -1.230709 | 0.000000 |
| 24               | 1                | 0              | -3.378807               | -3.390846 | 0.000000 |
| 25               | 1                | 0              | -0.951759               | -3.388551 | 0.000000 |
| 26               | 1                | 0              | 0.951759                | -3.388551 | 0.000000 |
| 27               | 1                | 0              | 3.410451                | 0.870028  | 0.000000 |
| 28               | 1                | 0              | 2.458692                | 2.518523  | 0.000000 |
| 29               | 1                | 0              | -2.458692               | 2.518523  | 0.000000 |
| 30               | 1                | 0              | -3.410451               | 0.870028  | 0.000000 |

**Absolute energies (a.u.) and x, y, z coordinates of structures optimized using  
the B3LYP-D3(BJ) functional and 6-311+G(d,p) basis set**

**Coronene (C<sub>3</sub>)**

E = -922.20533 a.u.

| Center<br>Number | Atomic<br>Number | Atomic<br>Type | Coordinates (Angstroms) |           |           |
|------------------|------------------|----------------|-------------------------|-----------|-----------|
|                  |                  |                | X                       | Y         | Z         |
| 1                | 6                | 0              | -1.346493               | 3.490807  | 0.000140  |
| 2                | 6                | 0              | -1.848165               | 2.160409  | -0.000050 |
| 3                | 6                | 0              | -0.926250               | 1.082676  | 0.001911  |
| 4                | 6                | 0              | 0.474542                | 1.343441  | -0.002045 |
| 5                | 6                | 0              | 0.946836                | 2.680777  | -0.000054 |
| 6                | 6                | 0              | 0.000000                | 3.741480  | -0.000017 |
| 7                | 6                | 0              | -1.400725               | -0.260755 | -0.002045 |
| 8                | 6                | 0              | 1.400750                | 0.260817  | 0.001911  |
| 9                | 6                | 0              | 0.926183                | -1.082686 | -0.002045 |
| 10               | 6                | 0              | -0.474500               | -1.343494 | 0.001911  |
| 11               | 6                | 0              | 1.848203                | -2.160373 | -0.000054 |
| 12               | 6                | 0              | 3.240217                | -1.870740 | -0.000017 |
| 13               | 6                | 0              | 3.696374                | -0.579307 | 0.000140  |
| 14               | 6                | 0              | 2.795052                | 0.520353  | -0.000050 |
| 15               | 6                | 0              | 3.240174                | 1.870864  | 0.000071  |
| 16               | 6                | 0              | 2.349834                | 2.911597  | -0.000020 |
| 17               | 1                | 0              | 2.707759                | 3.935416  | 0.000270  |
| 18               | 1                | 0              | 4.306999                | 2.066229  | -0.000190 |
| 19               | 1                | 0              | -2.054014               | 4.312832  | -0.000031 |
| 20               | 1                | 0              | 0.364424                | 4.762990  | 0.000337  |
| 21               | 1                | 0              | 3.942658                | -2.697095 | 0.000337  |
| 22               | 1                | 0              | 4.762029                | -0.377588 | -0.000031 |
| 23               | 6                | 0              | -3.240303               | 1.870641  | 0.000071  |
| 24               | 6                | 0              | -3.696434               | 0.579217  | -0.000020 |
| 25               | 6                | 0              | -2.795039               | -0.520405 | -0.000054 |
| 26               | 1                | 0              | -3.942906               | 2.696856  | -0.000190 |
| 27               | 1                | 0              | -4.762050               | 0.377280  | 0.000270  |
| 28               | 6                | 0              | -3.240217               | -1.870740 | -0.000017 |
| 29               | 6                | 0              | -2.349881               | -2.911500 | 0.000140  |
| 30               | 6                | 0              | -0.946887               | -2.680762 | -0.000050 |
| 31               | 1                | 0              | -4.307082               | -2.065895 | 0.000337  |
| 32               | 1                | 0              | -2.708015               | -3.935244 | -0.000031 |
| 33               | 6                | 0              | 1.346600                | -3.490814 | -0.000020 |
| 34               | 1                | 0              | 2.054291                | -4.312697 | 0.000270  |
| 35               | 6                | 0              | 0.000129                | -3.741505 | 0.000071  |
| 36               | 1                | 0              | -0.364093               | -4.763085 | -0.000190 |

**Cor-3BN**

E = -932.5406516 a.u.

| Center<br>Number | Atomic<br>Number | Atomic<br>Type | Coordinates (Angstroms) |          |          |
|------------------|------------------|----------------|-------------------------|----------|----------|
|                  |                  |                | X                       | Y        | Z        |
| 1                | 6                | 0              | 2.435310                | 2.843340 | 0.000000 |
| 2                | 6                | 0              | 2.470037                | 1.437963 | 0.000000 |
| 3                | 6                | 0              | 1.240094                | 0.730063 | 0.000000 |
| 4                | 6                | 0              | 0.000000                | 1.427046 | 0.000000 |



|    |   |   |           |           |          |
|----|---|---|-----------|-----------|----------|
| 5  | 6 | 0 | 0.021621  | 2.842963  | 0.000000 |
| 6  | 6 | 0 | 1.242304  | 3.536125  | 0.000000 |
| 7  | 6 | 0 | 1.235858  | -0.713523 | 0.000000 |
| 8  | 6 | 0 | -1.252300 | 0.708921  | 0.000000 |
| 9  | 6 | 0 | -1.235858 | -0.713523 | 0.000000 |
| 10 | 6 | 0 | 0.012206  | -1.438985 | 0.000000 |
| 11 | 6 | 0 | -2.472889 | -1.402757 | 0.000000 |
| 12 | 6 | 0 | -3.683526 | -0.692196 | 0.000000 |
| 13 | 6 | 0 | -3.680060 | 0.687371  | 0.000000 |
| 14 | 6 | 0 | -2.480331 | 1.420133  | 0.000000 |
| 15 | 1 | 0 | -1.069777 | 4.551029  | 0.000000 |
| 16 | 1 | 0 | -3.419398 | 3.640781  | 0.000000 |
| 17 | 1 | 0 | 3.371537  | 3.390871  | 0.000000 |
| 18 | 1 | 0 | 1.231753  | 4.621409  | 0.000000 |
| 19 | 1 | 0 | -4.618134 | -1.243975 | 0.000000 |
| 20 | 1 | 0 | -4.622349 | 1.224401  | 0.000000 |
| 21 | 6 | 0 | 2.451267  | -1.440206 | 0.000000 |
| 22 | 1 | 0 | 4.862708  | 1.140896  | 0.000000 |
| 23 | 1 | 0 | 4.476195  | -1.349060 | 0.000000 |
| 24 | 6 | 0 | 2.441222  | -2.843929 | 0.000000 |
| 25 | 6 | 0 | 1.244749  | -3.530711 | 0.000000 |
| 26 | 6 | 0 | 0.010294  | -2.858096 | 0.000000 |
| 27 | 1 | 0 | 3.386381  | -3.377434 | 0.000000 |
| 28 | 1 | 0 | 1.250812  | -4.615272 | 0.000000 |
| 29 | 1 | 0 | -3.406418 | -3.201968 | 0.000000 |
| 30 | 1 | 0 | -1.443309 | -4.781676 | 0.000000 |
| 31 | 7 | 0 | -1.172563 | 3.545885  | 0.000000 |
| 32 | 7 | 0 | -2.484545 | -2.788412 | 0.000000 |
| 33 | 7 | 0 | 3.657108  | -0.757473 | 0.000000 |
| 34 | 5 | 0 | -2.454383 | 2.943856  | 0.000000 |
| 35 | 5 | 0 | -1.322263 | -3.597486 | 0.000000 |
| 36 | 5 | 0 | 3.776646  | 0.653630  | 0.000000 |

**Cor-4BN**

E = -935.9920366 a.u.

| Center<br>Number | Atomic<br>Number | Atomic<br>Type | Coordinates (Angstroms) |           |          |
|------------------|------------------|----------------|-------------------------|-----------|----------|
|                  |                  |                | X                       | Y         | Z        |
| 1                | 6                | 0              | -3.675017               | 0.681123  | 0.000000 |
| 2                | 6                | 0              | -2.480781               | 1.413625  | 0.000000 |
| 3                | 6                | 0              | -1.246104               | 0.707166  | 0.000000 |
| 4                | 6                | 0              | -1.227899               | -0.714754 | 0.000000 |
| 5                | 6                | 0              | -2.466180               | -1.400875 | 0.000000 |
| 6                | 6                | 0              | -3.676531               | -0.702497 | 0.000000 |
| 7                | 6                | 0              | 0.000000                | 1.419817  | 0.000000 |
| 8                | 6                | 0              | 0.021236                | -1.434278 | 0.000000 |
| 9                | 6                | 0              | 1.237159                | -0.732879 | 0.000000 |
| 10               | 6                | 0              | 1.235180                | 0.713940  | 0.000000 |
| 11               | 6                | 0              | 2.483426                | -1.470075 | 0.000000 |
| 12               | 6                | 0              | 2.508759                | -2.849319 | 0.000000 |
| 13               | 1                | 0              | -3.351826               | -3.239144 | 0.000000 |
| 14               | 1                | 0              | -1.297743               | -4.721160 | 0.000000 |
| 15               | 1                | 0              | -4.618735               | 1.215548  | 0.000000 |
| 16               | 1                | 0              | -4.608052               | -1.258590 | 0.000000 |
| 17               | 1                | 0              | 3.481997                | -3.332944 | 0.000000 |
| 18               | 1                | 0              | 1.125657                | -4.789923 | 0.000000 |
| 19               | 6                | 0              | 0.019252                | 2.840269  | 0.000000 |

|    |   |   |           |           |          |
|----|---|---|-----------|-----------|----------|
| 20 | 1 | 0 | -3.425430 | 3.631295  | 0.000000 |
| 21 | 1 | 0 | -1.076288 | 4.545047  | 0.000000 |
| 22 | 6 | 0 | 1.233910  | 3.533620  | 0.000000 |
| 23 | 6 | 0 | 2.426097  | 2.833087  | 0.000000 |
| 24 | 6 | 0 | 2.460566  | 1.432397  | 0.000000 |
| 25 | 1 | 0 | 1.226068  | 4.618618  | 0.000000 |
| 26 | 1 | 0 | 3.364169  | 3.377591  | 0.000000 |
| 27 | 1 | 0 | 4.495910  | -1.330785 | 0.000000 |
| 28 | 1 | 0 | 4.853906  | 1.162318  | 0.000000 |
| 29 | 7 | 0 | -2.449918 | -2.786386 | 0.000000 |
| 30 | 7 | 0 | 3.670431  | -0.748029 | 0.000000 |
| 31 | 7 | 0 | -1.178156 | 3.539735  | 0.000000 |
| 32 | 5 | 0 | -1.260161 | -3.540025 | 0.000000 |
| 33 | 5 | 0 | 3.774492  | 0.660099  | 0.000000 |
| 34 | 5 | 0 | -2.458362 | 2.937861  | 0.000000 |
| 35 | 5 | 0 | 1.231441  | -3.606907 | 0.000000 |
| 36 | 7 | 0 | -0.003088 | -2.827492 | 0.000000 |

**Cor-5BN**

E = -939.5122935 a.u.

| Center<br>Number | Atomic<br>Number | Atomic<br>Type | Coordinates (Angstroms) |           |          |
|------------------|------------------|----------------|-------------------------|-----------|----------|
|                  |                  |                | X                       | Y         | Z        |
| 1                | 6                | 0              | -3.676740               | -0.731135 | 0.000000 |
| 2                | 6                | 0              | -2.479087               | -1.455323 | 0.000000 |
| 3                | 6                | 0              | -1.249335               | -0.736877 | 0.000000 |
| 4                | 6                | 0              | -1.249193               | 0.686383  | 0.000000 |
| 5                | 6                | 0              | -2.490266               | 1.365009  | 0.000000 |
| 6                | 6                | 0              | -3.692719               | 0.655738  | 0.000000 |
| 7                | 6                | 0              | 0.002242                | -1.439386 | 0.000000 |
| 8                | 6                | 0              | 0.000000                | 1.404142  | 0.000000 |
| 9                | 6                | 0              | 1.207929                | 0.722893  | 0.000000 |
| 10               | 6                | 0              | 1.225983                | -0.715784 | 0.000000 |
| 11               | 1                | 0              | -3.381210               | 3.203185  | 0.000000 |
| 12               | 1                | 0              | -1.336381               | 4.697529  | 0.000000 |
| 13               | 1                | 0              | -4.616976               | -1.272108 | 0.000000 |
| 14               | 1                | 0              | -4.631208               | 1.200146  | 0.000000 |
| 15               | 1                | 0              | 3.277196                | 3.503815  | 0.000000 |
| 16               | 1                | 0              | 1.111261                | 4.783667  | 0.000000 |
| 17               | 6                | 0              | 0.039750                | -2.859426 | 0.000000 |
| 18               | 1                | 0              | -3.398608               | -3.684113 | 0.000000 |
| 19               | 1                | 0              | -1.041167               | -4.575888 | 0.000000 |
| 20               | 6                | 0              | 1.266383                | -3.528319 | 0.000000 |
| 21               | 6                | 0              | 2.451185                | -2.805568 | 0.000000 |
| 22               | 6                | 0              | 2.472272                | -1.405555 | 0.000000 |
| 23               | 1                | 0              | 1.280263                | -4.613446 | 0.000000 |
| 24               | 1                | 0              | 3.394639                | -3.341548 | 0.000000 |
| 25               | 1                | 0              | 4.646409                | 1.293421  | 0.000000 |
| 26               | 1                | 0              | 4.856804                | -1.204614 | 0.000000 |
| 27               | 7                | 0              | -2.477971               | 2.753951  | 0.000000 |
| 28               | 7                | 0              | 3.772003                | 0.785821  | 0.000000 |
| 29               | 7                | 0              | -1.152043               | -3.571562 | 0.000000 |
| 30               | 5                | 0              | -1.289463               | 3.515059  | 0.000000 |
| 31               | 5                | 0              | 3.805921                | -0.635745 | 0.000000 |
| 32               | 5                | 0              | -2.438005               | -2.980732 | 0.000000 |
| 33               | 5                | 0              | 1.193294                | 3.599665  | 0.000000 |
| 34               | 7                | 0              | -0.030264               | 2.816245  | 0.000000 |

|    |   |   |          |          |          |
|----|---|---|----------|----------|----------|
| 35 | 7 | 0 | 2.439655 | 2.938314 | 0.000000 |
| 36 | 5 | 0 | 2.530029 | 1.503718 | 0.000000 |

---

**Cor-6BN**

E = -942.9705586 a.u.

---

| Center<br>Number | Atomic<br>Number | Atomic<br>Type | Coordinates (Angstroms) |           |          |
|------------------|------------------|----------------|-------------------------|-----------|----------|
|                  |                  |                | X                       | Y         | Z        |
| 1                | 6                | 0              | -3.662739               | -0.720077 | 0.000000 |
| 2                | 6                | 0              | -2.471803               | -1.444213 | 0.000000 |
| 3                | 6                | 0              | -1.230060               | -0.738218 | 0.000000 |
| 4                | 6                | 0              | -1.237953               | 0.687182  | 0.000000 |
| 5                | 6                | 0              | -2.483223               | 1.371929  | 0.000000 |
| 6                | 6                | 0              | -3.683198               | 0.671067  | 0.000000 |
| 7                | 6                | 0              | 0.014714                | -1.450037 | 0.000000 |
| 8                | 6                | 0              | 0.000000                | 1.398791  | 0.000000 |
| 9                | 6                | 0              | 1.210775                | 0.708683  | 0.000000 |
| 10               | 6                | 0              | 1.223523                | -0.721340 | 0.000000 |
| 11               | 1                | 0              | -3.363590               | 3.213652  | 0.000000 |
| 12               | 1                | 0              | -1.312616               | 4.699210  | 0.000000 |
| 13               | 1                | 0              | -4.602322               | -1.262258 | 0.000000 |
| 14               | 1                | 0              | -4.621654               | 1.214785  | 0.000000 |
| 15               | 1                | 0              | 3.293863                | 3.482457  | 0.000000 |
| 16               | 1                | 0              | 1.128695                | 4.774505  | 0.000000 |
| 17               | 6                | 0              | 0.039631                | -2.899033 | 0.000000 |
| 18               | 1                | 0              | -3.423662               | -3.656339 | 0.000000 |
| 19               | 1                | 0              | -1.078733               | -4.580056 | 0.000000 |
| 20               | 6                | 0              | 1.227116                | -3.593868 | 0.000000 |
| 21               | 1                | 0              | 1.177641                | -4.679517 | 0.000000 |
| 22               | 1                | 0              | 3.591572                | -3.344149 | 0.000000 |
| 23               | 1                | 0              | 4.641285                | 1.210250  | 0.000000 |
| 24               | 1                | 0              | 4.727858                | -1.291417 | 0.000000 |
| 25               | 7                | 0              | -2.462058               | 2.760616  | 0.000000 |
| 26               | 7                | 0              | 3.743840                | 0.746945  | 0.000000 |
| 27               | 7                | 0              | -1.177095               | -3.574319 | 0.000000 |
| 28               | 5                | 0              | -1.272610               | 3.516916  | 0.000000 |
| 29               | 5                | 0              | 3.720584                | -0.667593 | 0.000000 |
| 30               | 5                | 0              | -2.451641               | -2.968979 | 0.000000 |
| 31               | 5                | 0              | 1.207532                | 3.591053  | 0.000000 |
| 32               | 7                | 0              | -0.016685               | 2.810138  | 0.000000 |
| 33               | 7                | 0              | 2.451456                | 2.924766  | 0.000000 |
| 34               | 5                | 0              | 2.525267                | 1.492794  | 0.000000 |
| 35               | 5                | 0              | 2.513986                | -2.842885 | 0.000000 |
| 36               | 7                | 0              | 2.452741                | -1.384269 | 0.000000 |

---

**Cor-7BN**

E = -946.492969 a.u.

---

| Center<br>Number | Atomic<br>Number | Atomic<br>Type | Coordinates (Angstroms) |           |          |
|------------------|------------------|----------------|-------------------------|-----------|----------|
|                  |                  |                | X                       | Y         | Z        |
| 1                | 6                | 0              | -2.459048               | -2.803067 | 0.000000 |
| 2                | 6                | 0              | -2.488223               | -1.410677 | 0.000000 |
| 3                | 6                | 0              | -1.239963               | -0.706684 | 0.000000 |
| 4                | 6                | 0              | -0.014912               | -1.435168 | 0.000000 |

|    |   |   |           |           |          |
|----|---|---|-----------|-----------|----------|
| 5  | 6 | 0 | -0.052691 | -2.856268 | 0.000000 |
| 6  | 6 | 0 | -1.266448 | -3.529928 | 0.000000 |
| 7  | 6 | 0 | -1.225397 | 0.718664  | 0.000000 |
| 8  | 6 | 0 | 1.219802  | -0.720996 | 0.000000 |
| 9  | 6 | 0 | 1.235678  | 0.676086  | 0.000000 |
| 10 | 6 | 0 | 0.000000  | 1.389309  | 0.000000 |
| 11 | 1 | 0 | 1.100805  | -4.542255 | 0.000000 |
| 12 | 1 | 0 | 3.414476  | -3.512796 | 0.000000 |
| 13 | 1 | 0 | -3.399774 | -3.344169 | 0.000000 |
| 14 | 1 | 0 | -1.278538 | -4.614653 | 0.000000 |
| 15 | 1 | 0 | 4.676788  | 1.087708  | 0.000000 |
| 16 | 1 | 0 | 4.707542  | -1.428932 | 0.000000 |
| 17 | 1 | 0 | -4.873044 | -1.215327 | 0.000000 |
| 18 | 1 | 0 | -4.663246 | 1.285099  | 0.000000 |
| 19 | 1 | 0 | -3.281052 | 3.503504  | 0.000000 |
| 20 | 1 | 0 | -1.120289 | 4.766750  | 0.000000 |
| 21 | 1 | 0 | 3.369184  | 3.404984  | 0.000000 |
| 22 | 1 | 0 | 1.245954  | 4.727299  | 0.000000 |
| 23 | 7 | 0 | 1.160337  | -3.535020 | 0.000000 |
| 24 | 7 | 0 | 2.522128  | 2.855106  | 0.000000 |
| 25 | 7 | 0 | -3.788972 | 0.777125  | 0.000000 |
| 26 | 5 | 0 | 2.411486  | -2.884426 | 0.000000 |
| 27 | 5 | 0 | 1.281429  | 3.541261  | 0.000000 |
| 28 | 5 | 0 | -3.823600 | -0.643578 | 0.000000 |
| 29 | 5 | 0 | 3.720537  | -0.770185 | 0.000000 |
| 30 | 7 | 0 | 2.433984  | -1.442580 | 0.000000 |
| 31 | 7 | 0 | 3.770039  | 0.642199  | 0.000000 |
| 32 | 5 | 0 | 2.567771  | 1.425040  | 0.000000 |
| 33 | 5 | 0 | -1.194701 | 3.582171  | 0.000000 |
| 34 | 7 | 0 | 0.032412  | 2.804081  | 0.000000 |
| 35 | 7 | 0 | -2.449360 | 2.929894  | 0.000000 |
| 36 | 5 | 0 | -2.546035 | 1.497619  | 0.000000 |

**Cor-8BN**

E = -949.956896 a.u.

| Center<br>Number | Atomic<br>Number | Atomic<br>Type | Coordinates (Angstroms) |           |          |
|------------------|------------------|----------------|-------------------------|-----------|----------|
|                  |                  |                | X                       | Y         | Z        |
| 1                | 6                | 0              | 1.240826                | -0.712163 | 0.000000 |
| 2                | 6                | 0              | 0.024078                | -1.447343 | 0.000000 |
| 3                | 6                | 0              | 0.049969                | -2.895000 | 0.000000 |
| 4                | 6                | 0              | 1.225908                | -3.597906 | 0.000000 |
| 5                | 6                | 0              | 1.229981                | 0.703328  | 0.000000 |
| 6                | 6                | 0              | -1.200631               | -0.727420 | 0.000000 |
| 7                | 6                | 0              | -1.224312               | 0.677696  | 0.000000 |
| 8                | 6                | 0              | 0.000000                | 1.383074  | 0.000000 |
| 9                | 1                | 0              | -1.139035               | -4.541867 | 0.000000 |
| 10               | 1                | 0              | -3.437380               | -3.485013 | 0.000000 |
| 11               | 1                | 0              | 3.590096                | -3.355180 | 0.000000 |
| 12               | 1                | 0              | 1.171365                | -4.683048 | 0.000000 |
| 13               | 1                | 0              | -4.666382               | 1.107101  | 0.000000 |
| 14               | 1                | 0              | -4.698041               | -1.409758 | 0.000000 |
| 15               | 1                | 0              | 4.741611                | -1.304439 | 0.000000 |
| 16               | 1                | 0              | 4.659136                | 1.198790  | 0.000000 |
| 17               | 1                | 0              | 3.298613                | 3.482942  | 0.000000 |
| 18               | 1                | 0              | 1.140236                | 4.757432  | 0.000000 |
| 19               | 1                | 0              | -3.349376               | 3.413339  | 0.000000 |

|    |   |   |           |           |          |
|----|---|---|-----------|-----------|----------|
| 20 | 1 | 0 | -1.219678 | 4.729607  | 0.000000 |
| 21 | 7 | 0 | -1.185169 | -3.533606 | 0.000000 |
| 22 | 7 | 0 | -2.503153 | 2.862045  | 0.000000 |
| 23 | 7 | 0 | 3.760798  | 0.736917  | 0.000000 |
| 24 | 5 | 0 | -2.425849 | -2.870452 | 0.000000 |
| 25 | 5 | 0 | -1.262378 | 3.544106  | 0.000000 |
| 26 | 5 | 0 | 3.735909  | -0.677196 | 0.000000 |
| 27 | 5 | 0 | -3.709967 | -0.752891 | 0.000000 |
| 28 | 7 | 0 | -2.427318 | -1.430080 | 0.000000 |
| 29 | 7 | 0 | -3.760975 | 0.659440  | 0.000000 |
| 30 | 5 | 0 | -2.554931 | 1.432152  | 0.000000 |
| 31 | 5 | 0 | 1.210025  | 3.573144  | 0.000000 |
| 32 | 7 | 0 | -0.017725 | 2.798415  | 0.000000 |
| 33 | 7 | 0 | 2.462591  | 2.916215  | 0.000000 |
| 34 | 5 | 0 | 2.543023  | 1.486588  | 0.000000 |
| 35 | 5 | 0 | 2.516964  | -2.846107 | 0.000000 |
| 36 | 7 | 0 | 2.466656  | -1.389664 | 0.000000 |

-----

**Cor-9BN**

E = -953.4826925 a.u.

| Center<br>Number | Atomic<br>Number | Atomic<br>Type | Coordinates (Angstroms) |           |          |
|------------------|------------------|----------------|-------------------------|-----------|----------|
|                  |                  |                | X                       | Y         | Z        |
| 1                | 6                | 0              | 0.000000                | 1.399872  | 0.000000 |
| 2                | 6                | 0              | 1.230098                | 0.710198  | 0.000000 |
| 3                | 6                | 0              | -1.230098               | 0.710198  | 0.000000 |
| 4                | 6                | 0              | 1.212325                | -0.699936 | 0.000000 |
| 5                | 6                | 0              | 0.000000                | -1.420395 | 0.000000 |
| 6                | 6                | 0              | -1.212325               | -0.699936 | 0.000000 |
| 7                | 1                | 0              | 4.663870                | 1.149165  | 0.000000 |
| 8                | 1                | 0              | 4.713391                | -1.354752 | 0.000000 |
| 9                | 1                | 0              | 1.183446                | 4.759292  | 0.000000 |
| 10               | 1                | 0              | 3.327141                | 3.464447  | 0.000000 |
| 11               | 1                | 0              | 1.336729                | -4.613612 | 0.000000 |
| 12               | 1                | 0              | 3.529945                | -3.404540 | 0.000000 |
| 13               | 1                | 0              | -1.183446               | 4.759292  | 0.000000 |
| 14               | 1                | 0              | -3.327141               | 3.464447  | 0.000000 |
| 15               | 1                | 0              | -4.663870               | 1.149165  | 0.000000 |
| 16               | 1                | 0              | -4.713391               | -1.354752 | 0.000000 |
| 17               | 1                | 0              | -1.336729               | -4.613612 | 0.000000 |
| 18               | 1                | 0              | -3.529945               | -3.404540 | 0.000000 |
| 19               | 5                | 0              | 2.551961                | 1.473376  | 0.000000 |
| 20               | 5                | 0              | 3.714298                | -0.714385 | 0.000000 |
| 21               | 5                | 0              | 2.475825                | -2.859484 | 0.000000 |
| 22               | 5                | 0              | 1.238473                | 3.573869  | 0.000000 |
| 23               | 5                | 0              | -1.238473               | 3.573869  | 0.000000 |
| 24               | 5                | 0              | -2.551961               | 1.473376  | 0.000000 |
| 25               | 5                | 0              | -3.714298               | -0.714385 | 0.000000 |
| 26               | 5                | 0              | -2.475825               | -2.859484 | 0.000000 |
| 27               | 5                | 0              | 0.000000                | -2.946751 | 0.000000 |
| 28               | 7                | 0              | 2.439214                | -1.408281 | 0.000000 |
| 29               | 7                | 0              | 3.758466                | 0.701483  | 0.000000 |
| 30               | 7                | 0              | 2.486735                | 2.904185  | 0.000000 |
| 31               | 7                | 0              | 0.000000                | 2.816561  | 0.000000 |
| 32               | 7                | 0              | -2.486735               | 2.904185  | 0.000000 |
| 33               | 7                | 0              | -3.758466               | 0.701483  | 0.000000 |
| 34               | 7                | 0              | -2.439214               | -1.408281 | 0.000000 |

|    |   |   |           |           |          |
|----|---|---|-----------|-----------|----------|
| 35 | 7 | 0 | -1.271731 | -3.605668 | 0.000000 |
| 36 | 7 | 0 | 1.271731  | -3.605668 | 0.000000 |

### Benzene

E = -232.3301645 a.u.

| Center<br>Number | Atomic<br>Number | Atomic<br>Type | Coordinates (Angstroms) |           |          |
|------------------|------------------|----------------|-------------------------|-----------|----------|
|                  |                  |                | X                       | Y         | Z        |
| 1                | 6                | 0              | 0.000000                | 1.393673  | 0.000000 |
| 2                | 6                | 0              | 1.206956                | 0.696836  | 0.000000 |
| 3                | 6                | 0              | 1.206956                | -0.696836 | 0.000000 |
| 4                | 6                | 0              | 0.000000                | -1.393673 | 0.000000 |
| 5                | 6                | 0              | -1.206956               | -0.696836 | 0.000000 |
| 6                | 6                | 0              | -1.206956               | 0.696836  | 0.000000 |
| 7                | 1                | 0              | 0.000000                | 2.477417  | 0.000000 |
| 8                | 1                | 0              | 2.145506                | 1.238709  | 0.000000 |
| 9                | 1                | 0              | 2.145506                | -1.238709 | 0.000000 |
| 10               | 1                | 0              | 0.000000                | -2.477417 | 0.000000 |
| 11               | 1                | 0              | -2.145506               | -1.238709 | 0.000000 |
| 12               | 1                | 0              | -2.145506               | 1.238709  | 0.000000 |

### Naphthalene

E = -386.0253963 a.u.

| Center<br>Number | Atomic<br>Number | Atomic<br>Type | Coordinates (Angstroms) |           |           |
|------------------|------------------|----------------|-------------------------|-----------|-----------|
|                  |                  |                | X                       | Y         | Z         |
| 1                | 6                | 0              | 0.000000                | -2.428658 | -0.707261 |
| 2                | 6                | 0              | 0.000000                | -1.242423 | -1.400144 |
| 3                | 6                | 0              | 0.000000                | 0.000000  | -0.715450 |
| 4                | 6                | 0              | 0.000000                | 0.000000  | 0.715450  |
| 5                | 6                | 0              | 0.000000                | -1.242423 | 1.400144  |
| 6                | 6                | 0              | 0.000000                | -2.428658 | 0.707261  |
| 7                | 1                | 0              | 0.000000                | 1.240326  | -2.484981 |
| 8                | 1                | 0              | 0.000000                | -3.370768 | -1.243320 |
| 9                | 1                | 0              | 0.000000                | -1.240326 | -2.484981 |
| 10               | 6                | 0              | 0.000000                | 1.242423  | -1.400144 |
| 11               | 6                | 0              | 0.000000                | 1.242423  | 1.400144  |
| 12               | 1                | 0              | 0.000000                | -1.240326 | 2.484981  |
| 13               | 1                | 0              | 0.000000                | -3.370768 | 1.243320  |
| 14               | 6                | 0              | 0.000000                | 2.428658  | 0.707261  |
| 15               | 6                | 0              | 0.000000                | 2.428658  | -0.707261 |
| 16               | 1                | 0              | 0.000000                | 1.240326  | 2.484981  |
| 17               | 1                | 0              | 0.000000                | 3.370768  | 1.243320  |
| 18               | 1                | 0              | 0.000000                | 3.370768  | -1.243320 |

### Phenanthrene

E = -539.7235154 a.u.

| Center<br>Number | Atomic<br>Number | Atomic<br>Type | Coordinates (Angstroms) |           |           |
|------------------|------------------|----------------|-------------------------|-----------|-----------|
|                  |                  |                | X                       | Y         | Z         |
| 1                | 6                | 0              | 0.000000                | -3.552548 | -0.297476 |

|    |   |   |          |           |           |
|----|---|---|----------|-----------|-----------|
| 2  | 6 | 0 | 0.000000 | -2.831890 | 0.876750  |
| 3  | 6 | 0 | 0.000000 | -1.419745 | 0.865172  |
| 4  | 6 | 0 | 0.000000 | -0.726911 | -0.378053 |
| 5  | 6 | 0 | 0.000000 | -1.493800 | -1.563560 |
| 6  | 6 | 0 | 0.000000 | -2.873389 | -1.528001 |
| 7  | 6 | 0 | 0.000000 | -0.678322 | 2.091247  |
| 8  | 6 | 0 | 0.000000 | 0.726911  | -0.378053 |
| 9  | 6 | 0 | 0.000000 | 1.419745  | 0.865172  |
| 10 | 6 | 0 | 0.000000 | 0.678322  | 2.091247  |
| 11 | 6 | 0 | 0.000000 | 2.831890  | 0.876750  |
| 12 | 1 | 0 | 0.000000 | 3.342553  | 1.833801  |
| 13 | 6 | 0 | 0.000000 | 3.552548  | -0.297476 |
| 14 | 6 | 0 | 0.000000 | 2.873389  | -1.528001 |
| 15 | 6 | 0 | 0.000000 | 1.493800  | -1.563560 |
| 16 | 1 | 0 | 0.000000 | -1.229673 | 3.025285  |
| 17 | 1 | 0 | 0.000000 | -4.635971 | -0.275156 |
| 18 | 1 | 0 | 0.000000 | -3.342553 | 1.833801  |
| 19 | 1 | 0 | 0.000000 | -0.999165 | -2.525644 |
| 20 | 1 | 0 | 0.000000 | -3.435334 | -2.454759 |
| 21 | 1 | 0 | 0.000000 | 1.229673  | 3.025285  |
| 22 | 1 | 0 | 0.000000 | 4.635971  | -0.275156 |
| 23 | 1 | 0 | 0.000000 | 3.435334  | -2.454759 |
| 24 | 1 | 0 | 0.000000 | 0.999165  | -2.525644 |

### Triphenylene

E = -693.4194058 a.u.

| Center<br>Number | Atomic<br>Number | Atomic<br>Type | Coordinates (Angstroms) |           |          |
|------------------|------------------|----------------|-------------------------|-----------|----------|
|                  |                  |                | X                       | Y         | Z        |
| 1                | 6                | 0              | -0.699588               | 3.693421  | 0.000000 |
| 2                | 6                | 0              | -1.381871               | 2.493438  | 0.000000 |
| 3                | 6                | 0              | -0.708599               | 1.254066  | 0.000000 |
| 4                | 6                | 0              | 0.708599                | 1.254066  | 0.000000 |
| 5                | 6                | 0              | 1.381871                | 2.493438  | 0.000000 |
| 6                | 6                | 0              | 0.699588                | 3.693421  | 0.000000 |
| 7                | 6                | 0              | -1.440352               | -0.013369 | 0.000000 |
| 8                | 6                | 0              | 1.440352                | -0.013369 | 0.000000 |
| 9                | 6                | 0              | 0.731754                | -1.240697 | 0.000000 |
| 10               | 6                | 0              | -0.731754               | -1.240697 | 0.000000 |
| 11               | 6                | 0              | 1.468445                | -2.443454 | 0.000000 |
| 12               | 6                | 0              | 2.848802                | -2.452572 | 0.000000 |
| 13               | 6                | 0              | 3.548391                | -1.240849 | 0.000000 |
| 14               | 6                | 0              | 2.850316                | -0.049983 | 0.000000 |
| 15               | 1                | 0              | -1.248101               | 4.627949  | 0.000000 |
| 16               | 1                | 0              | 1.248101                | 4.627949  | 0.000000 |
| 17               | 1                | 0              | 3.383871                | -3.394862 | 0.000000 |
| 18               | 1                | 0              | 4.631972                | -1.233087 | 0.000000 |
| 19               | 6                | 0              | -2.850316               | -0.049983 | 0.000000 |
| 20               | 6                | 0              | -3.548391               | -1.240849 | 0.000000 |
| 21               | 6                | 0              | -2.848802               | -2.452572 | 0.000000 |
| 22               | 6                | 0              | -1.468445               | -2.443454 | 0.000000 |
| 23               | 1                | 0              | -4.631972               | -1.233087 | 0.000000 |
| 24               | 1                | 0              | -3.383871               | -3.394862 | 0.000000 |
| 25               | 1                | 0              | -0.951347               | -3.392280 | 0.000000 |
| 26               | 1                | 0              | 0.951347                | -3.392280 | 0.000000 |
| 27               | 1                | 0              | 3.413474                | 0.872249  | 0.000000 |
| 28               | 1                | 0              | 2.462127                | 2.520030  | 0.000000 |

|    |   |   |           |          |          |
|----|---|---|-----------|----------|----------|
| 29 | 1 | 0 | -2.462127 | 2.520030 | 0.000000 |
| 30 | 1 | 0 | -3.413474 | 0.872249 | 0.000000 |

**Absolute energies (a.u.) and x, y, z coordinates of structures optimized using  
the M06-2X functional and 6-311+G(d,p) basis set**

**Coronene (C<sub>3</sub>)**

E = -921.737221 a.u.

| Center<br>Number | Atomic<br>Number | Atomic<br>Type | Coordinates (Angstroms) |           |           |
|------------------|------------------|----------------|-------------------------|-----------|-----------|
|                  |                  |                | X                       | Y         | Z         |
| 1                | 6                | 0              | 1.342125                | 3.487042  | 0.000254  |
| 2                | 6                | 0              | 1.842104                | 2.154624  | 0.000608  |
| 3                | 6                | 0              | 0.925933                | 1.082970  | -0.004039 |
| 4                | 6                | 0              | -0.475021               | 1.343496  | 0.003688  |
| 5                | 6                | 0              | -0.945095               | 2.672517  | -0.000572 |
| 6                | 6                | 0              | 0.000000                | 3.736529  | 0.000026  |
| 7                | 6                | 0              | 1.401012                | -0.260367 | 0.003688  |
| 8                | 6                | 0              | -1.400846               | 0.260397  | -0.004039 |
| 9                | 6                | 0              | -0.925991               | -1.083128 | 0.003688  |
| 10               | 6                | 0              | 0.474912                | -1.343367 | -0.004039 |
| 11               | 6                | 0              | -1.841920               | -2.154734 | -0.000572 |
| 12               | 6                | 0              | -3.235929               | -1.868264 | 0.000026  |
| 13               | 6                | 0              | -3.690929               | -0.581207 | 0.000254  |
| 14               | 6                | 0              | -2.787011               | 0.517997  | 0.000608  |
| 15               | 6                | 0              | -3.235865               | 1.868506  | 0.000077  |
| 16               | 6                | 0              | -2.348963               | 2.906072  | -0.000103 |
| 17               | 1                | 0              | -2.704640               | 3.930836  | -0.000951 |
| 18               | 1                | 0              | -4.303472               | 2.060446  | 0.000905  |
| 19               | 1                | 0              | 2.051827                | 4.307478  | 0.001187  |
| 20               | 1                | 0              | -0.367256               | 4.757216  | -0.000779 |
| 21               | 1                | 0              | -3.936242               | -2.696661 | -0.000779 |
| 22               | 1                | 0              | -4.756299               | -0.376805 | 0.001187  |
| 23               | 6                | 0              | 3.236106                | 1.868088  | 0.000077  |
| 24               | 6                | 0              | 3.691214                | 0.581226  | -0.000103 |
| 25               | 6                | 0              | 2.787015                | -0.517783 | -0.000572 |
| 26               | 1                | 0              | 3.936135                | 2.696693  | 0.000905  |
| 27               | 1                | 0              | 4.756524                | 0.376869  | -0.000951 |
| 28               | 6                | 0              | 3.235929                | -1.868264 | 0.000026  |
| 29               | 6                | 0              | 2.348804                | -2.905835 | 0.000254  |
| 30               | 6                | 0              | 0.944907                | -2.672621 | 0.000608  |
| 31               | 1                | 0              | 4.303498                | -2.060555 | -0.000779 |
| 32               | 1                | 0              | 2.704472                | -3.930673 | 0.001187  |
| 33               | 6                | 0              | -1.342251               | -3.487298 | -0.000103 |
| 34               | 1                | 0              | -2.051884               | -4.307705 | -0.000951 |
| 35               | 6                | 0              | -0.000241               | -3.736594 | 0.000077  |
| 36               | 1                | 0              | 0.367338                | -4.757139 | 0.000905  |

**Cor-3BN**

E = -932.078611 a.u.

| Center | Atomic | Atomic | Coordinates (Angstroms) |  |  |
|--------|--------|--------|-------------------------|--|--|
|--------|--------|--------|-------------------------|--|--|



| Number | Number | Type | X         | Y         | Z        |
|--------|--------|------|-----------|-----------|----------|
| 1      | 6      | 0    | 2.427251  | 2.842220  | 0.000000 |
| 2      | 6      | 0    | 2.461360  | 1.439664  | 0.000000 |
| 3      | 6      | 0    | 1.237734  | 0.734469  | 0.000000 |
| 4      | 6      | 0    | 0.000000  | 1.426626  | 0.000000 |
| 5      | 6      | 0    | 0.018236  | 2.837255  | 0.000000 |
| 6      | 6      | 0    | 1.235664  | 3.533236  | 0.000000 |
| 7      | 6      | 0    | 1.235494  | -0.713313 | 0.000000 |
| 8      | 6      | 0    | -1.254936 | 0.704675  | 0.000000 |
| 9      | 6      | 0    | -1.235494 | -0.713313 | 0.000000 |
| 10     | 6      | 0    | 0.017201  | -1.439144 | 0.000000 |
| 11     | 6      | 0    | -2.466253 | -1.402834 | 0.000000 |
| 12     | 6      | 0    | -3.677704 | -0.696502 | 0.000000 |
| 13     | 6      | 0    | -3.675060 | 0.680950  | 0.000000 |
| 14     | 6      | 0    | -2.477466 | 1.411769  | 0.000000 |
| 15     | 1      | 0    | -1.070972 | 4.546126  | 0.000000 |
| 16     | 1      | 0    | -3.422265 | 3.633000  | 0.000000 |
| 17     | 1      | 0    | 3.363622  | 3.390195  | 0.000000 |
| 18     | 1      | 0    | 1.222240  | 4.618231  | 0.000000 |
| 19     | 1      | 0    | -4.610625 | -1.250624 | 0.000000 |
| 20     | 1      | 0    | -4.617806 | 1.217884  | 0.000000 |
| 21     | 6      | 0    | 2.448017  | -1.434421 | 0.000000 |
| 22     | 1      | 0    | 4.857403  | 1.147268  | 0.000000 |
| 23     | 1      | 0    | 4.472547  | -1.345574 | 0.000000 |
| 24     | 6      | 0    | 2.442041  | -2.836734 | 0.000000 |
| 25     | 6      | 0    | 1.247810  | -3.523171 | 0.000000 |
| 26     | 6      | 0    | 0.016106  | -2.851433 | 0.000000 |
| 27     | 1      | 0    | 3.388385  | -3.367606 | 0.000000 |
| 28     | 1      | 0    | 1.254184  | -4.608079 | 0.000000 |
| 29     | 1      | 0    | -3.401575 | -3.200552 | 0.000000 |
| 30     | 1      | 0    | -1.435138 | -4.780268 | 0.000000 |
| 31     | 7      | 0    | -1.175085 | 3.541338  | 0.000000 |
| 32     | 7      | 0    | -2.479346 | -2.788323 | 0.000000 |
| 33     | 7      | 0    | 3.654431  | -0.753016 | 0.000000 |
| 34     | 5      | 0    | -2.454848 | 2.941084  | 0.000000 |
| 35     | 5      | 0    | -1.319630 | -3.596503 | 0.000000 |
| 36     | 5      | 0    | 3.774478  | 0.655419  | 0.000000 |

**Cor-4BN**

E = -935.5332581 a.u.

| Center Number | Atomic Number | Atomic Type | Coordinates (Angstroms) |           |          |
|---------------|---------------|-------------|-------------------------|-----------|----------|
|               |               |             | X                       | Y         | Z        |
| 1             | 6             | 0           | 3.669382                | -0.676707 | 0.000000 |
| 2             | 6             | 0           | 2.477580                | -1.406354 | 0.000000 |
| 3             | 6             | 0           | 1.247861                | -0.703395 | 0.000000 |
| 4             | 6             | 0           | 1.227222                | 0.712970  | 0.000000 |
| 5             | 6             | 0           | 2.460249                | 1.399768  | 0.000000 |
| 6             | 6             | 0           | 3.670536                | 0.705619  | 0.000000 |
| 7             | 6             | 0           | 0.000000                | -1.419214 | 0.000000 |
| 8             | 6             | 0           | -0.027194               | 1.432880  | 0.000000 |
| 9             | 6             | 0           | -1.234888               | 0.732642  | 0.000000 |
| 10            | 6             | 0           | -1.231296               | -0.717422 | 0.000000 |
| 11            | 6             | 0           | -2.482330               | 1.469907  | 0.000000 |
| 12            | 6             | 0           | -2.512752               | 2.844026  | 0.000000 |
| 13            | 1             | 0           | 3.348431                | 3.235946  | 0.000000 |

|    |   |   |           |           |          |
|----|---|---|-----------|-----------|----------|
| 14 | 1 | 0 | 1.288037  | 4.717840  | 0.000000 |
| 15 | 1 | 0 | 4.613323  | -1.211657 | 0.000000 |
| 16 | 1 | 0 | 4.600236  | 1.264262  | 0.000000 |
| 17 | 1 | 0 | -3.487039 | 3.323970  | 0.000000 |
| 18 | 1 | 0 | -1.124603 | 4.784778  | 0.000000 |
| 19 | 6 | 0 | -0.016240 | -2.835722 | 0.000000 |
| 20 | 1 | 0 | 3.428838  | -3.622946 | 0.000000 |
| 21 | 1 | 0 | 1.077122  | -4.541512 | 0.000000 |
| 22 | 6 | 0 | -1.226840 | -3.530571 | 0.000000 |
| 23 | 6 | 0 | -2.418319 | -2.830611 | 0.000000 |
| 24 | 6 | 0 | -2.451472 | -1.433879 | 0.000000 |
| 25 | 1 | 0 | -1.217051 | -4.615228 | 0.000000 |
| 26 | 1 | 0 | -3.356571 | -3.375662 | 0.000000 |
| 27 | 1 | 0 | -4.494108 | 1.327220  | 0.000000 |
| 28 | 1 | 0 | -4.847591 | -1.168001 | 0.000000 |
| 29 | 7 | 0 | 2.445968  | 2.784854  | 0.000000 |
| 30 | 7 | 0 | -3.668020 | 0.745485  | 0.000000 |
| 31 | 7 | 0 | 1.180632  | -3.536584 | 0.000000 |
| 32 | 5 | 0 | 1.256618  | 3.536682  | 0.000000 |
| 33 | 5 | 0 | -3.771340 | -0.660422 | 0.000000 |
| 34 | 5 | 0 | 2.458425  | -2.936020 | 0.000000 |
| 35 | 5 | 0 | -1.231626 | 3.602170  | 0.000000 |
| 36 | 7 | 0 | -0.001208 | 2.821292  | 0.000000 |

**Cor-5BN**

E = -939.0595283 a.u.

| Center<br>Number | Atomic<br>Number | Atomic<br>Type | Coordinates (Angstroms) |           |          |
|------------------|------------------|----------------|-------------------------|-----------|----------|
|                  |                  |                | X                       | Y         | Z        |
| 1                | 6                | 0              | -3.668545               | -0.740901 | 0.000000 |
| 2                | 6                | 0              | -2.470780               | -1.457663 | 0.000000 |
| 3                | 6                | 0              | -1.248448               | -0.737898 | 0.000000 |
| 4                | 6                | 0              | -1.251223               | 0.679730  | 0.000000 |
| 5                | 6                | 0              | -2.490319               | 1.354631  | 0.000000 |
| 6                | 6                | 0              | -3.689684               | 0.644678  | 0.000000 |
| 7                | 6                | 0              | 0.007157                | -1.439087 | 0.000000 |
| 8                | 6                | 0              | 0.000000                | 1.402632  | 0.000000 |
| 9                | 6                | 0              | 1.202578                | 0.726375  | 0.000000 |
| 10               | 6                | 0              | 1.223829                | -0.715094 | 0.000000 |
| 11               | 1                | 0              | -3.390378               | 3.187043  | 0.000000 |
| 12               | 1                | 0              | -1.344991               | 4.689274  | 0.000000 |
| 13               | 1                | 0              | -4.606850               | -1.286130 | 0.000000 |
| 14               | 1                | 0              | -4.628287               | 1.188289  | 0.000000 |
| 15               | 1                | 0              | 3.267182                | 3.513020  | 0.000000 |
| 16               | 1                | 0              | 1.092768                | 4.783759  | 0.000000 |
| 17               | 6                | 0              | 0.047450                | -2.855605 | 0.000000 |
| 18               | 1                | 0              | -3.388354               | -3.688821 | 0.000000 |
| 19               | 1                | 0              | -1.025147               | -4.576913 | 0.000000 |
| 20               | 6                | 0              | 1.272545                | -3.520754 | 0.000000 |
| 21               | 6                | 0              | 2.453991                | -2.793554 | 0.000000 |
| 22               | 6                | 0              | 2.468419                | -1.397559 | 0.000000 |
| 23               | 1                | 0              | 1.288490                | -4.605482 | 0.000000 |
| 24               | 1                | 0              | 3.399638                | -3.326625 | 0.000000 |
| 25               | 1                | 0              | 4.642752                | 1.306950  | 0.000000 |
| 26               | 1                | 0              | 4.853945                | -1.193744 | 0.000000 |
| 27               | 7                | 0              | -2.484952               | 2.742797  | 0.000000 |
| 28               | 7                | 0              | 3.769897                | 0.797774  | 0.000000 |

|    |   |   |           |           |          |
|----|---|---|-----------|-----------|----------|
| 29 | 7 | 0 | -1.141241 | -3.573390 | 0.000000 |
| 30 | 5 | 0 | -1.298994 | 3.506872  | 0.000000 |
| 31 | 5 | 0 | 3.805786  | -0.622356 | 0.000000 |
| 32 | 5 | 0 | -2.427048 | -2.988338 | 0.000000 |
| 33 | 5 | 0 | 1.181513  | 3.600597  | 0.000000 |
| 34 | 7 | 0 | -0.037702 | 2.811059  | 0.000000 |
| 35 | 7 | 0 | 2.431667  | 2.945204  | 0.000000 |
| 36 | 5 | 0 | 2.525489  | 1.512358  | 0.000000 |

### Cor-6BN

E = -942.5215989 a.u.

| Center<br>Number | Atomic<br>Number | Atomic<br>Type | Coordinates (Angstroms) |           |          |
|------------------|------------------|----------------|-------------------------|-----------|----------|
|                  |                  |                | X                       | Y         | Z        |
| 1                | 6                | 0              | -3.654176               | -0.726344 | 0.000000 |
| 2                | 6                | 0              | -2.464941               | -1.443321 | 0.000000 |
| 3                | 6                | 0              | -1.227717               | -0.737029 | 0.000000 |
| 4                | 6                | 0              | -1.238557               | 0.682530  | 0.000000 |
| 5                | 6                | 0              | -2.483056               | 1.364874  | 0.000000 |
| 6                | 6                | 0              | -3.679525               | 0.665045  | 0.000000 |
| 7                | 6                | 0              | 0.017996                | -1.447723 | 0.000000 |
| 8                | 6                | 0              | 0.000000                | 1.397119  | 0.000000 |
| 9                | 6                | 0              | 1.205836                | 0.710721  | 0.000000 |
| 10               | 6                | 0              | 1.219759                | -0.720734 | 0.000000 |
| 11               | 1                | 0              | -3.369594               | 3.201806  | 0.000000 |
| 12               | 1                | 0              | -1.316481               | 4.692869  | 0.000000 |
| 13               | 1                | 0              | -4.592370               | -1.271971 | 0.000000 |
| 14               | 1                | 0              | -4.618072               | 1.207978  | 0.000000 |
| 15               | 1                | 0              | 3.287044                | 3.489018  | 0.000000 |
| 16               | 1                | 0              | 1.115692                | 4.773785  | 0.000000 |
| 17               | 6                | 0              | 0.046532                | -2.899313 | 0.000000 |
| 18               | 1                | 0              | -3.417179               | -3.656895 | 0.000000 |
| 19               | 1                | 0              | -1.069489               | -4.580847 | 0.000000 |
| 20               | 6                | 0              | 1.228995                | -3.591727 | 0.000000 |
| 21               | 1                | 0              | 1.179883                | -4.676697 | 0.000000 |
| 22               | 1                | 0              | 3.595171                | -3.329665 | 0.000000 |
| 23               | 1                | 0              | 4.638954                | 1.217421  | 0.000000 |
| 24               | 1                | 0              | 4.722417                | -1.285937 | 0.000000 |
| 25               | 7                | 0              | -2.466372               | 2.752711  | 0.000000 |
| 26               | 7                | 0              | 3.741700                | 0.754854  | 0.000000 |
| 27               | 7                | 0              | -1.169920               | -3.575569 | 0.000000 |
| 28               | 5                | 0              | -1.278589               | 3.510435  | 0.000000 |
| 29               | 5                | 0              | 3.717123                | -0.659797 | 0.000000 |
| 30               | 5                | 0              | -2.443689               | -2.973354 | 0.000000 |
| 31               | 5                | 0              | 1.199230                | 3.590874  | 0.000000 |
| 32               | 7                | 0              | -0.021452               | 2.805525  | 0.000000 |
| 33               | 7                | 0              | 2.446364                | 2.929397  | 0.000000 |
| 34               | 5                | 0              | 2.522603                | 1.499029  | 0.000000 |
| 35               | 5                | 0              | 2.516220                | -2.832809 | 0.000000 |
| 36               | 7                | 0              | 2.448630                | -1.377966 | 0.000000 |

### Cor-7BN

E = -946.0500351 a.u.

| Center | Atomic | Atomic | Coordinates (Angstroms) |  |  |
|--------|--------|--------|-------------------------|--|--|
|--------|--------|--------|-------------------------|--|--|

| Number | Number | Type | X         | Y         | Z        |
|--------|--------|------|-----------|-----------|----------|
| 1      | 6      | 0    | -2.460621 | -2.792075 | 0.000000 |
| 2      | 6      | 0    | -2.484731 | -1.404933 | 0.000000 |
| 3      | 6      | 0    | -1.237096 | -0.705433 | 0.000000 |
| 4      | 6      | 0    | -0.018978 | -1.433790 | 0.000000 |
| 5      | 6      | 0    | -0.059290 | -2.853717 | 0.000000 |
| 6      | 6      | 0    | -1.270182 | -3.523951 | 0.000000 |
| 7      | 6      | 0    | -1.221236 | 0.719717  | 0.000000 |
| 8      | 6      | 0    | 1.218096  | -0.720884 | 0.000000 |
| 9      | 6      | 0    | 1.234923  | 0.670520  | 0.000000 |
| 10     | 6      | 0    | 0.000000  | 1.385723  | 0.000000 |
| 11     | 1      | 0    | 1.087676  | -4.542080 | 0.000000 |
| 12     | 1      | 0    | 3.405945  | -3.514652 | 0.000000 |
| 13     | 1      | 0    | -3.403368 | -3.330889 | 0.000000 |
| 14     | 1      | 0    | -1.283371 | -4.608194 | 0.000000 |
| 15     | 1      | 0    | 4.679095  | 1.078254  | 0.000000 |
| 16     | 1      | 0    | 4.698181  | -1.443100 | 0.000000 |
| 17     | 1      | 0    | -4.870679 | -1.209370 | 0.000000 |
| 18     | 1      | 0    | -4.661397 | 1.294636  | 0.000000 |
| 19     | 1      | 0    | -3.274680 | 3.508236  | 0.000000 |
| 20     | 1      | 0    | -1.106962 | 4.764784  | 0.000000 |
| 21     | 1      | 0    | 3.375967  | 3.397158  | 0.000000 |
| 22     | 1      | 0    | 1.249891  | 4.720178  | 0.000000 |
| 23     | 7      | 0    | 1.151151  | -3.535238 | 0.000000 |
| 24     | 7      | 0    | 2.528552  | 2.848624  | 0.000000 |
| 25     | 7      | 0    | -3.788585 | 0.785246  | 0.000000 |
| 26     | 5      | 0    | 2.402843  | -2.886817 | 0.000000 |
| 27     | 5      | 0    | 1.287158  | 3.534586  | 0.000000 |
| 28     | 5      | 0    | -3.824494 | -0.634226 | 0.000000 |
| 29     | 5      | 0    | 3.716290  | -0.777757 | 0.000000 |
| 30     | 7      | 0    | 2.427036  | -1.444611 | 0.000000 |
| 31     | 7      | 0    | 3.771889  | 0.634866  | 0.000000 |
| 32     | 5      | 0    | 2.571863  | 1.419452  | 0.000000 |
| 33     | 5      | 0    | -1.186642 | 3.580961  | 0.000000 |
| 34     | 7      | 0    | 0.037428  | 2.798369  | 0.000000 |
| 35     | 7      | 0    | -2.444367 | 2.933263  | 0.000000 |
| 36     | 5      | 0    | -2.543685 | 1.502672  | 0.000000 |

**Cor-8BN**

E = -949.5186283 a.u.

| Center Number | Atomic Number | Atomic Type | Coordinates (Angstroms) |           |          |
|---------------|---------------|-------------|-------------------------|-----------|----------|
|               |               |             | X                       | Y         | Z        |
| 1             | 6             | 0           | 1.237380                | -0.711188 | 0.000000 |
| 2             | 6             | 0           | 0.025064                | -1.444801 | 0.000000 |
| 3             | 6             | 0           | 0.053164                | -2.896105 | 0.000000 |
| 4             | 6             | 0           | 1.223634                | -3.598227 | 0.000000 |
| 5             | 6             | 0           | 1.226906                | 0.702080  | 0.000000 |
| 6             | 6             | 0           | -1.197809               | -0.726648 | 0.000000 |
| 7             | 6             | 0           | -1.221972               | 0.675110  | 0.000000 |
| 8             | 6             | 0           | 0.000000                | 1.379506  | 0.000000 |
| 9             | 1             | 0           | -1.135299               | -4.540374 | 0.000000 |
| 10            | 1             | 0           | -3.434147               | -3.480833 | 0.000000 |
| 11            | 1             | 0           | 3.590376                | -3.345868 | 0.000000 |
| 12            | 1             | 0           | 1.167243                | -4.682581 | 0.000000 |
| 13            | 1             | 0           | -4.666985               | 1.105202  | 0.000000 |

|    |   |   |           |           |          |
|----|---|---|-----------|-----------|----------|
| 14 | 1 | 0 | -4.690751 | -1.414773 | 0.000000 |
| 15 | 1 | 0 | 4.735167  | -1.306125 | 0.000000 |
| 16 | 1 | 0 | 4.658832  | 1.200104  | 0.000000 |
| 17 | 1 | 0 | 3.297353  | 3.483467  | 0.000000 |
| 18 | 1 | 0 | 1.134409  | 4.753849  | 0.000000 |
| 19 | 1 | 0 | -3.350557 | 3.411559  | 0.000000 |
| 20 | 1 | 0 | -1.216744 | 4.725095  | 0.000000 |
| 21 | 7 | 0 | -1.181354 | -3.532252 | 0.000000 |
| 22 | 7 | 0 | -2.504861 | 2.860245  | 0.000000 |
| 23 | 7 | 0 | 3.760604  | 0.739270  | 0.000000 |
| 24 | 5 | 0 | -2.421554 | -2.868149 | 0.000000 |
| 25 | 5 | 0 | -1.262373 | 3.539996  | 0.000000 |
| 26 | 5 | 0 | 3.732571  | -0.674853 | 0.000000 |
| 27 | 5 | 0 | -3.706010 | -0.753786 | 0.000000 |
| 28 | 7 | 0 | -2.422140 | -1.427900 | 0.000000 |
| 29 | 7 | 0 | -3.761537 | 0.658881  | 0.000000 |
| 30 | 5 | 0 | -2.556389 | 1.431388  | 0.000000 |
| 31 | 5 | 0 | 1.207360  | 3.570083  | 0.000000 |
| 32 | 7 | 0 | -0.018669 | 2.793028  | 0.000000 |
| 33 | 7 | 0 | 2.462095  | 2.916320  | 0.000000 |
| 34 | 5 | 0 | 2.542888  | 1.488006  | 0.000000 |
| 35 | 5 | 0 | 2.515920  | -2.839849 | 0.000000 |
| 36 | 7 | 0 | 2.461697  | -1.386342 | 0.000000 |

---

### Cor-9BN

E = -953.0504806 a.u.

---

| Center<br>Number | Atomic<br>Number | Atomic<br>Type | Coordinates (Angstroms) |           |          |
|------------------|------------------|----------------|-------------------------|-----------|----------|
|                  |                  |                | X                       | Y         | Z        |
| 1                | 6                | 0              | 0.000000                | 1.396550  | 0.000000 |
| 2                | 6                | 0              | -1.227496               | 0.708655  | 0.000000 |
| 3                | 6                | 0              | 1.227461                | 0.708715  | 0.000000 |
| 4                | 6                | 0              | -1.209448               | -0.698275 | 0.000000 |
| 5                | 6                | 0              | 0.000035                | -1.417370 | 0.000000 |
| 6                | 6                | 0              | 1.209448                | -0.698275 | 0.000000 |
| 7                | 1                | 0              | -4.664170               | 1.148489  | 0.000000 |
| 8                | 1                | 0              | -4.707052               | -1.357182 | 0.000000 |
| 9                | 1                | 0              | -1.179154               | 4.755365  | 0.000000 |
| 10               | 1                | 0              | -3.326797               | 3.464990  | 0.000000 |
| 11               | 1                | 0              | -1.337371               | -4.613586 | 0.000000 |
| 12               | 1                | 0              | -3.528690               | -3.398860 | 0.000000 |
| 13               | 1                | 0              | 1.178172                | 4.755018  | 0.000000 |
| 14               | 1                | 0              | 3.326706                | 3.465045  | 0.000000 |
| 15               | 1                | 0              | 4.664168                | 1.148596  | 0.000000 |
| 16               | 1                | 0              | 4.707844                | -1.356505 | 0.000000 |
| 17               | 1                | 0              | 1.337464                | -4.613534 | 0.000000 |
| 18               | 1                | 0              | 3.528880                | -3.397836 | 0.000000 |
| 19               | 5                | 0              | -2.553016               | 1.474192  | 0.000000 |
| 20               | 5                | 0              | -3.710351               | -0.713848 | 0.000000 |
| 21               | 5                | 0              | -2.473491               | -2.856473 | 0.000000 |
| 22               | 5                | 0              | -1.237033               | 3.570343  | 0.000000 |
| 23               | 5                | 0              | 1.236965                | 3.570182  | 0.000000 |
| 24               | 5                | 0              | 2.553196                | 1.473881  | 0.000000 |
| 25               | 5                | 0              | 3.710524                | -0.713870 | 0.000000 |
| 26               | 5                | 0              | 2.473386                | -2.856334 | 0.000000 |
| 27               | 5                | 0              | -0.000180               | -2.948073 | 0.000000 |
| 28               | 7                | 0              | -2.434789               | -1.405701 | 0.000000 |

|    |   |   |           |           |          |
|----|---|---|-----------|-----------|----------|
| 29 | 7 | 0 | -3.758641 | 0.702410  | 0.000000 |
| 30 | 7 | 0 | -2.487464 | 2.903936  | 0.000000 |
| 31 | 7 | 0 | 0.000022  | 2.811440  | 0.000000 |
| 32 | 7 | 0 | 2.487625  | 2.903874  | 0.000000 |
| 33 | 7 | 0 | 3.758614  | 0.702239  | 0.000000 |
| 34 | 7 | 0 | 2.434767  | -1.405739 | 0.000000 |
| 35 | 7 | 0 | 1.271016  | -3.606284 | 0.000000 |
| 36 | 7 | 0 | -1.271150 | -3.606175 | 0.000000 |

### Benzene

E = -232.1983428 a.u.

| Center<br>Number | Atomic<br>Number | Atomic<br>Type | Coordinates (Angstroms) |           |          |
|------------------|------------------|----------------|-------------------------|-----------|----------|
|                  |                  |                | X                       | Y         | Z        |
| 1                | 6                | 0              | 0.000000                | 1.391689  | 0.000000 |
| 2                | 6                | 0              | 1.205238                | 0.695845  | 0.000000 |
| 3                | 6                | 0              | 1.205238                | -0.695845 | 0.000000 |
| 4                | 6                | 0              | 0.000000                | -1.391689 | 0.000000 |
| 5                | 6                | 0              | -1.205238               | -0.695845 | 0.000000 |
| 6                | 6                | 0              | -1.205238               | 0.695845  | 0.000000 |
| 7                | 1                | 0              | 0.000000                | 2.475425  | 0.000000 |
| 8                | 1                | 0              | 2.143781                | 1.237713  | 0.000000 |
| 9                | 1                | 0              | 2.143781                | -1.237713 | 0.000000 |
| 10               | 1                | 0              | 0.000000                | -2.475425 | 0.000000 |
| 11               | 1                | 0              | -2.143781               | -1.237713 | 0.000000 |
| 12               | 1                | 0              | -2.143781               | 1.237713  | 0.000000 |

### Naphthalene

E = -385.81533 a.u.

| Center<br>Number | Atomic<br>Number | Atomic<br>Type | Coordinates (Angstroms) |           |           |
|------------------|------------------|----------------|-------------------------|-----------|-----------|
|                  |                  |                | X                       | Y         | Z         |
| 1                | 6                | 0              | 0.000000                | -2.424140 | -0.707750 |
| 2                | 6                | 0              | 0.000000                | -1.241445 | -1.397951 |
| 3                | 6                | 0              | 0.000000                | 0.000000  | -0.710916 |
| 4                | 6                | 0              | 0.000000                | 0.000000  | 0.710916  |
| 5                | 6                | 0              | 0.000000                | -1.241445 | 1.397951  |
| 6                | 6                | 0              | 0.000000                | -2.424140 | 0.707750  |
| 7                | 1                | 0              | 0.000000                | 1.236690  | -2.482850 |
| 8                | 1                | 0              | 0.000000                | -3.365870 | -1.243747 |
| 9                | 1                | 0              | 0.000000                | -1.236690 | -2.482850 |
| 10               | 6                | 0              | 0.000000                | 1.241445  | -1.397951 |
| 11               | 6                | 0              | 0.000000                | 1.241445  | 1.397951  |
| 12               | 1                | 0              | 0.000000                | -1.236690 | 2.482850  |
| 13               | 1                | 0              | 0.000000                | -3.365870 | 1.243747  |
| 14               | 6                | 0              | 0.000000                | 2.424140  | 0.707750  |
| 15               | 6                | 0              | 0.000000                | 2.424140  | -0.707750 |
| 16               | 1                | 0              | 0.000000                | 1.236690  | 2.482850  |
| 17               | 1                | 0              | 0.000000                | 3.365870  | 1.243747  |
| 18               | 1                | 0              | 0.000000                | 3.365870  | -1.243747 |

### Phenanthrene

E = -539.4359032 a.u.

| Center<br>Number | Atomic<br>Number | Atomic<br>Type | Coordinates (Angstroms) |           |           |
|------------------|------------------|----------------|-------------------------|-----------|-----------|
|                  |                  |                | X                       | Y         | Z         |
| 1                | 6                | 0              | 0.000000                | -3.547617 | -0.294831 |
| 2                | 6                | 0              | 0.000000                | -2.826625 | 0.875508  |
| 3                | 6                | 0              | 0.000000                | -1.416227 | 0.859111  |
| 4                | 6                | 0              | 0.000000                | -0.728426 | -0.377107 |
| 5                | 6                | 0              | 0.000000                | -1.493870 | -1.562634 |
| 6                | 6                | 0              | 0.000000                | -2.870391 | -1.525011 |
| 7                | 6                | 0              | 0.000000                | -0.675539 | 2.090171  |
| 8                | 6                | 0              | 0.000000                | 0.728426  | -0.377107 |
| 9                | 6                | 0              | 0.000000                | 1.416227  | 0.859111  |
| 10               | 6                | 0              | 0.000000                | 0.675539  | 2.090171  |
| 11               | 6                | 0              | 0.000000                | 2.826625  | 0.875508  |
| 12               | 1                | 0              | 0.000000                | 3.334246  | 1.834315  |
| 13               | 6                | 0              | 0.000000                | 3.547617  | -0.294831 |
| 14               | 6                | 0              | 0.000000                | 2.870391  | -1.525011 |
| 15               | 6                | 0              | 0.000000                | 1.493870  | -1.562634 |
| 16               | 1                | 0              | 0.000000                | -1.230216 | 3.022328  |
| 17               | 1                | 0              | 0.000000                | -4.630626 | -0.271254 |
| 18               | 1                | 0              | 0.000000                | -3.334246 | 1.834315  |
| 19               | 1                | 0              | 0.000000                | -1.001414 | -2.525958 |
| 20               | 1                | 0              | 0.000000                | -3.433571 | -2.450668 |
| 21               | 1                | 0              | 0.000000                | 1.230216  | 3.022328  |
| 22               | 1                | 0              | 0.000000                | 4.630626  | -0.271254 |
| 23               | 1                | 0              | 0.000000                | 3.433571  | -2.450668 |
| 24               | 1                | 0              | 0.000000                | 1.001414  | -2.525958 |

### Triphenylene

E = -693.0544321 a.u.

| Center<br>Number | Atomic<br>Number | Atomic<br>Type | Coordinates (Angstroms) |           |          |
|------------------|------------------|----------------|-------------------------|-----------|----------|
|                  |                  |                | X                       | Y         | Z        |
| 1                | 6                | 0              | -0.698428               | 3.689217  | 0.000000 |
| 2                | 6                | 0              | -1.379554               | 2.491082  | 0.000000 |
| 3                | 6                | 0              | -0.705094               | 1.254850  | 0.000000 |
| 4                | 6                | 0              | 0.705094                | 1.254850  | 0.000000 |
| 5                | 6                | 0              | 1.379554                | 2.491082  | 0.000000 |
| 6                | 6                | 0              | 0.698428                | 3.689217  | 0.000000 |
| 7                | 6                | 0              | -1.439279               | -0.016796 | 0.000000 |
| 8                | 6                | 0              | 1.439279                | -0.016796 | 0.000000 |
| 9                | 6                | 0              | 0.734185                | -1.238054 | 0.000000 |
| 10               | 6                | 0              | -0.734185               | -1.238054 | 0.000000 |
| 11               | 6                | 0              | 1.467563                | -2.440269 | 0.000000 |
| 12               | 6                | 0              | 2.845741                | -2.449465 | 0.000000 |
| 13               | 6                | 0              | 3.544169                | -1.239752 | 0.000000 |
| 14               | 6                | 0              | 2.847117                | -0.050812 | 0.000000 |
| 15               | 1                | 0              | -1.246875               | 4.623380  | 0.000000 |
| 16               | 1                | 0              | 1.246875                | 4.623380  | 0.000000 |
| 17               | 1                | 0              | 3.380527                | -3.391515 | 0.000000 |
| 18               | 1                | 0              | 4.627402                | -1.231865 | 0.000000 |
| 19               | 6                | 0              | -2.847117               | -0.050812 | 0.000000 |
| 20               | 6                | 0              | -3.544169               | -1.239752 | 0.000000 |
| 21               | 6                | 0              | -2.845741               | -2.449465 | 0.000000 |

|    |   |   |           |           |          |
|----|---|---|-----------|-----------|----------|
| 22 | 6 | 0 | -1.467563 | -2.440269 | 0.000000 |
| 23 | 1 | 0 | -4.627402 | -1.231865 | 0.000000 |
| 24 | 1 | 0 | -3.380527 | -3.391515 | 0.000000 |
| 25 | 1 | 0 | -0.953527 | -3.390663 | 0.000000 |
| 26 | 1 | 0 | 0.953527  | -3.390663 | 0.000000 |
| 27 | 1 | 0 | 3.413164  | 0.869553  | 0.000000 |
| 28 | 1 | 0 | 2.459637  | 2.521110  | 0.000000 |
| 29 | 1 | 0 | -2.459637 | 2.521110  | 0.000000 |
| 30 | 1 | 0 | -3.413164 | 0.869553  | 0.000000 |

---
